1 Title

2 Plant growers' environmental consciousness may not be enough to mitigate pollinator  
3 declines: a questionnaire-based case study in Hungary

4

5 Running title

6 Pesticide use and pollinator support in Hungarian plant growers

7

8 Zsófia Varga-Szilay<sup>1\*</sup>, Gábor Pozsgai<sup>2</sup>

9

10 <sup>1</sup>Doctoral School of Biology, Institute of Biology, ELTE Eötvös Loránd University,  
11 Budapest, Hungary

12 <sup>2</sup>cE3c – Centre for Ecology, Evolution and Environmental Changes/Azorean Biodiversity  
13 Group, CHANGE – Global Change and Sustainability Institute, Departamento de  
14 Ciências e Engenharia do Ambiente, Universidade dos Açores, Açores, Portugal

15

16 \*Corresponding author: Zsófia Varga-Szilay, Doctoral School of Biology, Institute of  
17 Biology, ELTE Eötvös Loránd University, 1117 Budapest, Hungary,  
18 zsofia@vargaszilay.hu

19

20 **Keywords:** pest management, synthetic pesticides, neonicotinoids, pollinator-friendly  
21 gardens, plant growing practices, ecological trap

22 **ABSTRACT**

23 **BACKGROUND**

24 Pesticides are one of the most important anthropogenic-related stressors. In times of  
25 global pollinator decline, the role of integrated farming and that of urban gardens in  
26 supporting wild pollinators is becoming increasingly important. We circulated an online  
27 questionnaire to survey the plant protection practices among Hungarian farmers and  
28 garden owners with a particular emphasis on pollinator protection.

29 **RESULTS**

30 We found that plant growers heavily rely on pesticide use, and pesticides are widely used  
31 in otherwise pollinator-friendly gardens. Whether pesticide use practices were driven by  
32 expert opinion and the respondents' gender were the best predictors of pesticide use.  
33 Although most respondents supported pollinators, pesticides are also widely used among  
34 home garden owners, which can pose a non-evident ecological trap for pollinator  
35 populations in the gardens.

36 **CONCLUSION**

37 Special attention should be paid to implementing measures to reduce pesticide, use not  
38 only in farmlands but also in home gardens. Environmental education and financial  
39 support through agroecological schemes could efficiently promote the transition.  
40 However, whereas farmers can be encouraged to reduce pesticide use mostly by expert  
41 advice, garden owners are likely to rely on more conventional information channels. The  
42 attitude of Hungarian plant growers can provide an insight into pesticide use practices of  
43 Central and Eastern European countries, but similar surveys are needed across Europe for  
44 a complete understanding of broad-scale processes. This work lays the foundations for

45 similar studies which can inform and facilitate the transformation processes to pesticide-  
46 free farming and gardening.

47

## 48 **1 INTRODUCTION**

49 In the Anthropocene, biodiversity declines at an alarming pace. One of the important  
50 groups, the insects, is among the most impacted (e.g. Hallmann et al. <sup>1</sup>; Zattara and Aizen  
51 <sup>2</sup>). Insect declines pose a major threat to a variety of ecosystem functions and the delivery  
52 of the derived ecosystem services, all of which are vital to humans <sup>3,4</sup>. One important  
53 ecosystem service, mostly provided by insects, is pollination <sup>5</sup>. Insect pollinators suffer  
54 from habitat fragmentation, reduction of flower resources, lack of nesting space, as well  
55 as from exposure to pesticides from agricultural activities <sup>6-8</sup>. Despite their long-known  
56 negative effects on human and environmental health <sup>9,10</sup>, pesticides are widely used both  
57 in industrial-scale farming and urban green areas and their application has even increased  
58 with agricultural intensification in recent decades <sup>11</sup>. Indeed, the spillover of chemical  
59 insecticide residues from farmland can negatively affect wild insect pollinators in  
60 adjacent natural and semi-natural areas <sup>12,13</sup> causing direct mortality, behavioural  
61 abnormalities, and reduced reproduction rates <sup>14</sup>. Furthermore, the concomitant use of  
62 agrochemicals (pesticides and fertilisers) can cause an even more detrimental ‘cocktail  
63 effect’ to insect pollinators <sup>15-17</sup>. In fact, a combination of over sixteen different  
64 agrochemicals was detected in flying insects in nature conservation areas adjacent to  
65 agricultural lands across Germany <sup>18</sup> and the USA <sup>19</sup>. Thus, agrochemicals are suggested  
66 to play a major role in driving global insect declines <sup>20,21</sup>, particularly on farmlands <sup>22</sup>.

67 To address biodiversity loss on farmlands, particularly that of pollinators, the  
68 European Commission created a farm strategy to cut the use of chemical pesticides in

69 European countries<sup>23</sup> and the reduction or complete elimination of pesticide use has been  
70 advised by the scientific community (e.g. Goulson and Nicholls<sup>7</sup>). A number of modern  
71 synthetic pesticides have been banned (e.g. in the European Union all neonicotinoids  
72 except acetamiprid) after they have been proven to harm non-target insects (like bees) in  
73 addition to the pest species targetted. In fact, the transition to alternative agricultural  
74 practices is possible without yield losses<sup>24</sup> whilst pest damage can be reduced and farm  
75 profitability maintained after lowering, but not completely abandoning, pesticide use<sup>25,26</sup>.  
76 Despite the increasing number of organic farms<sup>27,28</sup> in the European Union, which may  
77 be the first step toward a pesticide-free, and thus a biodiversity-friendly, farming, the  
78 conversion process can take years because the current conventional plant protection  
79 strategies employed on non-organic farms still require synthetic pesticide input.  
80 Nevertheless, evidence suggests that these integrated efforts may be a first step toward  
81 maintaining healthy ecosystems. For example, management that promotes ecosystem  
82 services (such as biological control or pollination) can support high insect diversity in  
83 areas of agricultural mosaics<sup>29</sup>. Moreover, even in conventionally managed farms,  
84 increasing the proportion of semi-natural habitats, such as hedges or field-edge flower  
85 strips, can dramatically increase the diversity of insects that are beneficial to agriculture,  
86 including that of pollinators<sup>30,31</sup>. However, although increasing natural habitat areas or  
87 employing other integrated pest management approaches can lead to increased pollinator  
88 and other insect diversity, unless these ecosystem-based approaches are combined with  
89 pollinator-friendly management, their positive effect will be reduced or completely  
90 eliminated by the use of synthetic pesticides<sup>32-35</sup>. Since socio-economic factors can  
91 dictate how rapidly the transition to pesticide-free farming unfolds, knowing farmers'  
92 approaches to these novel strategies is essential for future planning.

93           Whilst it may be difficult to achieve pesticide-free pest control within high-  
94 intensity farming (especially in monocultures), it may be a more feasible approach in  
95 small-scale farms and urban areas. Small-scale sustainable farming systems and well-  
96 planned urban green areas, such as biodiversity-friendly parks and allotments  
97 (community gardens), can mitigate pollinator declines<sup>36,37</sup>. In fact, in a landscape mosaic  
98 with a high proportion of urban areas, organically managed parcels of land can maintain  
99 high biodiversity and serve as a source of native pollinators within a landscape where  
100 most land is not managed with the maintenance of biodiversity as a key goal<sup>38,39</sup>.

101           Moreover, an increasing number of scientific papers support the premise that  
102 urban and suburban gardens function as refuges and local hotspots for biodiversity<sup>40,41</sup>,  
103 and support diverse communities of insect pollinators, even in highly urbanised areas<sup>42</sup>.  
104 These gardens can be near-natural and support viable metapopulations of rare species<sup>43</sup>.  
105 However, the true conservation potential of human-altered areas for pollinators depends  
106 on the available floral resources, nesting and hiding spaces, and on the proportion of near-  
107 natural areas that can be found in the urban landscape. These factors also determine the  
108 abundance and diversity of pollinator communities<sup>37,44</sup>.

109           Urban gardens may not be always beneficial for insect pollinators though. First,  
110 there is a wide selection of pesticides in shops and supermarkets that are targeted at  
111 domestic users and which may be applied in otherwise pollinator-friendly gardens.  
112 Second, synthetic pesticides can also get into gardens unintentionally when ornamental  
113 plants sold as ‘bee-friendly’ in horticultures are treated with various fungicides and  
114 insecticides<sup>45</sup>. As a consequence, insects lured to supposedly pollinator-friendly gardens  
115 can be exposed to a number of synthetic pesticides (especially neonicotinoids) and their  
116 residues and this exposure, in turn, can lead to lethal and sublethal effects<sup>19,46</sup>. The

117 process of banning synthetic pesticides for non-agricultural uses has already begun in  
118 some European countries (such as France<sup>47-49</sup> but others, including Hungary, are lagging  
119 behind. Yet, we have no information on what proportion of private gardens are treated  
120 with chemical plant protection products.

121       There is a large knowledge gap in our understanding of how efficiently farmlands  
122 and urban and suburban gardens mitigate insect biodiversity loss at a country scale and  
123 how farmers and garden owners approach the transition away from the use of pesticides.  
124 Gaining insight into their management habits, motivations and willingness to change is  
125 vital for developing further action.

126       Thus, we conducted a survey to measure plant growers' dependence on pesticides  
127 (highlighting acetamiprid-containing insecticides), particularly to investigate the  
128 pesticide application practices and the attitude towards protecting wild pollinators of  
129 those who own less than one hectare of land (henceforth home gardens or gardens). We  
130 focussed our work on Hungary, a typical, Central-Eastern European country with mainly  
131 conventional agriculture in which chemical and more hazardous pesticide use trends are  
132 likely to reflect those of general Europeans<sup>50</sup>.

133       We aimed to investigate 1) what factors best predict pesticide use in agricultural  
134 areas and to what extent plant growers think their application is necessary, 2) to what  
135 extent plant growers think the use of insecticides (as a subset of pesticides) is necessary  
136 and what are the main considerations determining their selection, 3) how dependent plant  
137 growers are on the single currently allowed neonicotinoid (acetamiprid), and 4) if  
138 acetamiprid is used, what other pesticides are used simultaneously. Our additional aims  
139 were to specifically investigate the home garden owners' approach to pesticide use and  
140 pollinator support. We were interested in 1) how necessary garden owners think it is to

141 use pesticides, 2) what they think about the threats to wild pollinators and how this affects  
142 their management practices and 3) what factors predict whether or not gardeners provide  
143 support for wild pollinators and what the most common such forms of support are.

144 We hypothesised that Hungarian plant growers are highly dependent on pesticide  
145 input and home garden owners have little awareness of linked environmental issues.  
146 Nevertheless, we predicted that home garden owners who predominantly produced for  
147 their own needs were more aware of the environmental hazards of pesticides than large-  
148 scale farmers and we also hypothesised that the pesticide use among those who supported  
149 pollinators was less frequent.

150

## 151 **2 MATERIAL AND METHODS**

### 152 **2.1 Questionnaire Design**

153 We circulated an online questionnaire that consisted of 61 closed-ended questions, all of  
154 which were mandatory to respond to. The questionnaire had eight sections to collect  
155 information about 1) sociodemographic factors, 2) type of farming, 3) use of plant  
156 protection products and 4-6) insecticides and their means of application, 7) protection of  
157 wild pollinators, and the questionnaire included one question 8) about how the  
158 questionnaire reached respondents (**Supporting Information S1**). All responses were  
159 recorded anonymously, however, respondents could provide their email addresses at the  
160 end. The questionnaire was designed in Google Forms and circulated in Hungarian  
161 language. The questionnaire was shared on social media platforms (such as Facebook  
162 groups and Facebook pages, and agricultural websites) and on farming and entomological  
163 mailing lists. The form was available from 26 April to 20 August in 2021.

164 Respondents who do not farm in Hungary were excluded from the analysis and  
165 data from Pest county were merged with those from Budapest. The number of respondents  
166 was standardised for 100,000 inhabitants in Hungary to improve representativeness.

167 In this study, we include both chemical and non-chemical pesticides in the group  
168 of ‘pesticides’ and ‘plant protection products’. We also use the word ‘insecticide’  
169 inclusively for synthetic insecticides and insecticides that can be used in organic farming.

170

## 171 **2.2 Data processing and statistical analysis**

172 The original categorical replies were on a few occasions re-categorised for analytical  
173 purposes. Education categories were merged into ‘elementary’, ‘middle’, ‘high’, and  
174 ‘postgraduate’ levels. The most important sociodemographic parameters and the  
175 categories used are listed in **Table 1**, and all other parameters can be found in **Supporting**  
176 **Information S1**. Although they were separated in the original questionnaire, the two  
177 kinds of agricultural experts, ‘plant doctors’ and ‘plant protection experts’ were later  
178 merged into a combined ‘expert’ category. When the additional plant protection products  
179 which were used with acetamiprid were named, they were assigned into nine categories  
180 or the combination of those, as ‘adhesion promoter’, ‘insecticide(s)’, ‘insecticide(s) and  
181 acaricide(s)’, ‘insecticide(s) and fungicide(s)’, ‘insecticide(s), fungicide(s) and fertiliser’,  
182 ‘fertiliser’, ‘fungicide(s)’, ‘fungicide(s) and acaricide(s)’, ‘fungicide(s) and fertiliser’. In  
183 the question about how respondents support pollinators the textual responses for food and  
184 habitat provision-related answers may overlap although when categorising these, we  
185 choose the one which was most strongly emphasised by the respondent. In the same  
186 question, we did not create a separate category for ‘outreach’, because it only occurred in  
187 a single response. When textual responses were given to the types of support which could



188 not have been categorised as direct action (e.g. ‘I do not harm them’), they were  
189 interpreted as ‘no support’.

190 When the approach solely of garden owners (as a subset of all plant growers) to  
191 pesticide use and their attitude to wild pollinators were investigated, only landowners  
192 with less than 1-hectare land were included in the analysis.

193 We used Spearman correlation tests to examine if sociodemographic factors and  
194 farming habits correlate with pesticide use. P-values were corrected according to Holm’s  
195 method. For calculating the correlation matrix the ‘*psych*’ (version 2.1.9) <sup>51</sup>, and for  
196 visualising them the ‘*corrplot*’ (version 0.92) <sup>52</sup> R packages were used. We used the chi-  
197 square test to compare plant protection habits of home garden owners and large-scale  
198 farmers. We used machine learning techniques with Gradient Boosting Machine (GBM)  
199 for generating our models to investigate 1) which socioeconomic factors determine  
200 whether or not pesticides were used in farmlands, and 2) which socioeconomic factors  
201 determine whether or not pollinators were supported in home gardens. The model fit was  
202 evaluated using the Area Under the Curve (AUC) score and by examining the accuracy  
203 of the best fitting model. We used the ‘*gbm*’ (version 2.1.8) <sup>53</sup>, ‘*caret*’ (version 6.0.90) <sup>54</sup>,  
204 and ‘*yardstick*’ (version 0.0.9) <sup>55</sup> R packages for modelling. Likert Scales figures were  
205 plotted using the ‘*likert*’ (version 1.3.5) <sup>56</sup> and the map was created using the ‘*sf*’ (version  
206 1.0.3) <sup>57</sup> R packages. All analyses were done and figures were created using the R 4.1.1  
207 statistical software <sup>58</sup>.

208

### 209 **3 RESULTS**

210 Of the 463 people who completed the questionnaire, 246 were male, 214 were female,  
211 and three did not state their gender. The willingness to respond was slightly unbalanced,

212 as more responses were received from the western than from the eastern counties (**Figure**  
213 **1**). Pest country was the region that yielded the largest proportion of responses (22.0%).

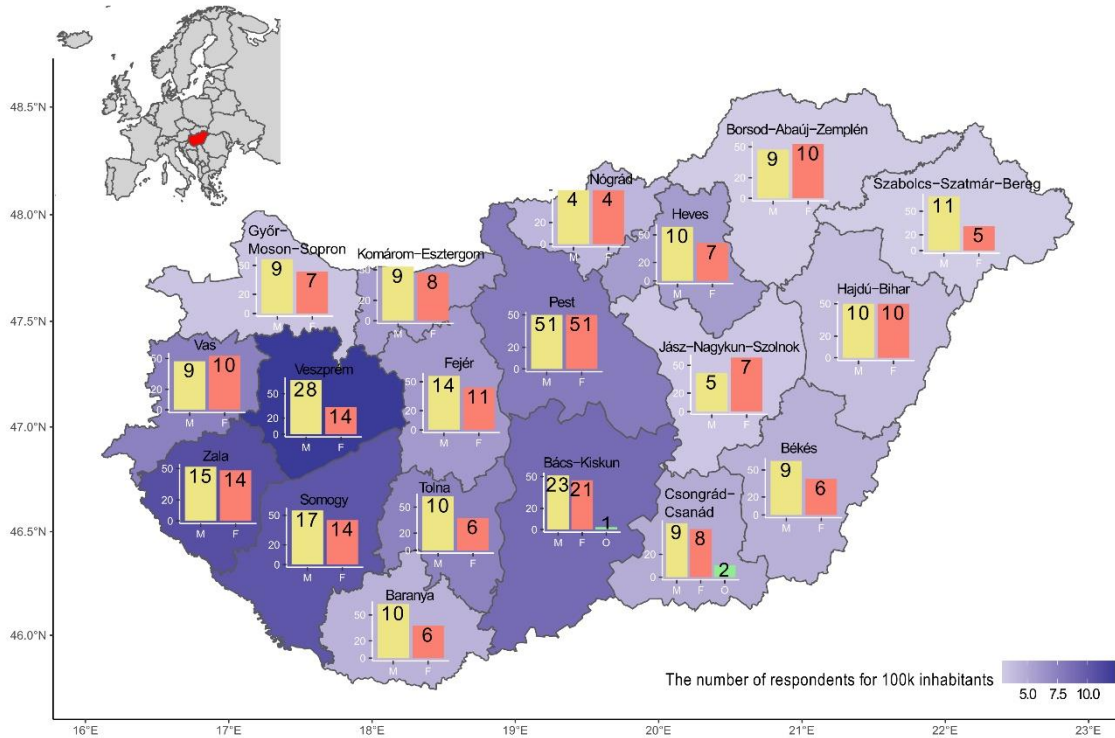

214  
215 **Figure 1.** Distribution of respondents by gender ("M" = male, "F" = female, "O" =  
216 unknown). Y-axis shows the percentage of the genders and the numbers on the barplots  
217 indicate the exact number of respondents in the 19 counties of Hungary. County names  
218 are indicated in bold. The colour depth in the map indicates the number of respondents  
219 per 100,000 inhabitants. Note that the sum of the numbers indicated on the barplots is  
220 greater than the number of respondents because respondents who farmed in more than  
221 one county were counted multiple times.

222

223 Among the respondents, the two middle-age categories (36–45 and 46–55 years  
224 old) were the most frequent, and 60.3% of all respondents (n = 279) fall into the high-  
225 level (but not Ph.D.) education group. Of all plant growers, 302 (65.2%) had less than  
226 one hectare of farming area (**Table 1**). The most commonly grown crops were vegetables

227 and fruits, followed by grapes and root/tuberous plants (**Supporting Information S2**).  
 228 Of the respondents, 181 (39.1%) used a pest forecasting system and 370 growers (79.9%)  
 229 supported natural enemies of pests (**Supporting Information S3**).

230

231 **Table 1.** Sociodemographic characteristics of the study population (n = 463)

| Variables         |              | Total (n = 463) |      |
|-------------------|--------------|-----------------|------|
|                   |              | n               | %    |
| Gender            | Male         | 246             | 53.1 |
|                   | Female       | 214             | 46.2 |
|                   | Unknown      | 3               | 0.6  |
| Age               | 18-25        | 27              | 5.8  |
|                   | 26-35        | 73              | 15.8 |
|                   | 36-45        | 126             | 27.2 |
|                   | 46-55        | 117             | 25.3 |
|                   | 56-65        | 62              | 13.4 |
|                   | over 65      | 58              | 12.5 |
| Education level   | Elementary   | 6               | 1.3  |
|                   | Middle       | 139             | 30.0 |
|                   | High         | 279             | 60.3 |
|                   | Postgraduate | 39              | 8.4  |
| Residence type    | Farmland     | 20              | 4.3  |
|                   | Countryside  | 174             | 37.6 |
|                   | Town         | 136             | 29.4 |
|                   | Major city   | 93              | 20.1 |
|                   | Capital      | 40              | 8.6  |
| Farming area size | < 1 ha       | 302             | 65.2 |
|                   | 1-9.9 ha     | 58              | 12.5 |
|                   | 10-29.9 ha   | 25              | 5.4  |
|                   | 30-49.9 ha   | 8               | 1.7  |
|                   | 50-99.9 ha   | 16              | 3.5  |
|                   | 100-299.9 ha | 14              | 3.0  |
|                   | 300-499.9 ha | 11              | 2.4  |

|              |    |     |
|--------------|----|-----|
| 500-999.9 ha | 7  | 1.5 |
| ≥ 1.000 ha   | 22 | 1.5 |

232

### 233 **3.1 Plant protection habits of all plant growers**

234 The majority of plant growers in an area of less than one hectare were individual farmers  
 235 who produce exclusively for their own consumption (n = 251), while the majority of  
 236 farmers in an area larger than one hectare either produce for sale privately or as part of a  
 237 farmers' association (n = 107). Of these smallholders, over 95% used pesticides (**Table**  
 238 **2**). However, of all respondents, 311 (67.2%) used pesticides, and 212 of them (68.2%)  
 239 used them together with some additives. Among the pesticide users, 244 (78.5%) usually  
 240 did not spray during daytime in a flowering culture (**Supporting Information 4**). Of  
 241 those plant growers who used pesticides, 243 (79.0 %) felt these products were necessary  
 242 for farming, with 150 (48.2%) of users considering pesticides as being crucial, and 93  
 243 (29.9%) of them regarding them as important.

244

245 **Table 2.** Distribution of farming types among the study population (n = 463)

| Area size | Type of farming                             | Uses pesticide |       | Pesticide-free |      |
|-----------|---------------------------------------------|----------------|-------|----------------|------|
|           |                                             | n              | %     | n              | %    |
| <1ha      | Individual: production for own use          | 134            | 53.4  | 117            | 46.6 |
|           | Individual: production for own use and sale | 27             | 69.2  | 12             | 30.8 |
|           | Individual: production for sale             | 9              | 81.8  | 2              | 18.2 |
|           | In farmers' association                     | 1              | 100.0 | -              | -    |
| >1ha      | Individual: production for own use          | 5              | 50.0  | 5              | 50.0 |
|           | Individual: production for own use and sale | 33             | 75.0  | 11             | 25.0 |
|           | Individual: production for sale             | 59             | 95.2  | 3              | 4.8  |
|           | In farmers' association                     | 43             | 95.6  | 2              | 4.4  |

246

247 The sociodemographic and farming habit factors that were examined did not show  
248 a strong correlation with pesticide use (and nor with each other); the highest significant  
249 correlation ( $p < 0.05$ , Spearman's Rho = 0.35) was with what growers thought about the  
250 risks of pesticide use (**Supporting Information S5**). However, the GBM model  
251 suggested that the best predictors for pesticide use in agricultural areas were if the  
252 respondents had consulted with an expert or were themselves trained agricultural experts  
253 (relative influence: 27.04, 84.4% of those who do versus 42.0% of those who do not  
254 consult with experts, or are expert themselves, used pesticides) and the respondents'  
255 gender (relative influence: 18.41, 50.5% of females versus 82.1% of males used  
256 pesticides) (model accuracy: 0.79, AUC = 0.86, Sensitivity: 0.89, Specificity: 0.60)  
257 (**Figure 2, Supporting Information S6**).

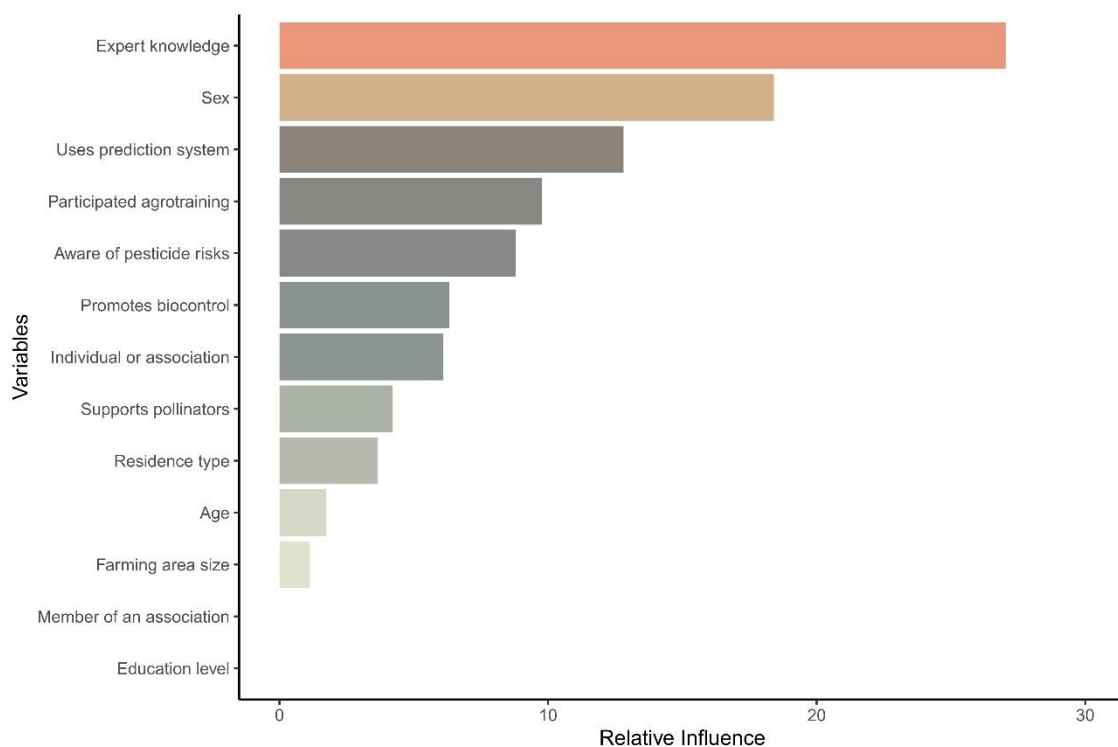

258

259 **Figure 2.** The relative influence of factors generated from the Gradient Boosting  
260 Machine (GBM) model for predicting pesticides used in farming areas.

261

262 Out of the 311 pesticide users, 243 (78.1%) felt that the use of insecticide was  
 263 particularly indispensable for them. The main aspects that determined the choice of an  
 264 insecticide were if they were harmless to humans, posed a low risk for bees and whether  
 265 growers had previous experience with the product. The techniques by which the  
 266 insecticide can be applied (such as if they can be used in flowering crops, if they can be  
 267 used during daytime, or if they can be sprayed from the air) were the least important  
 268 aspects to users (**Figure 3**).

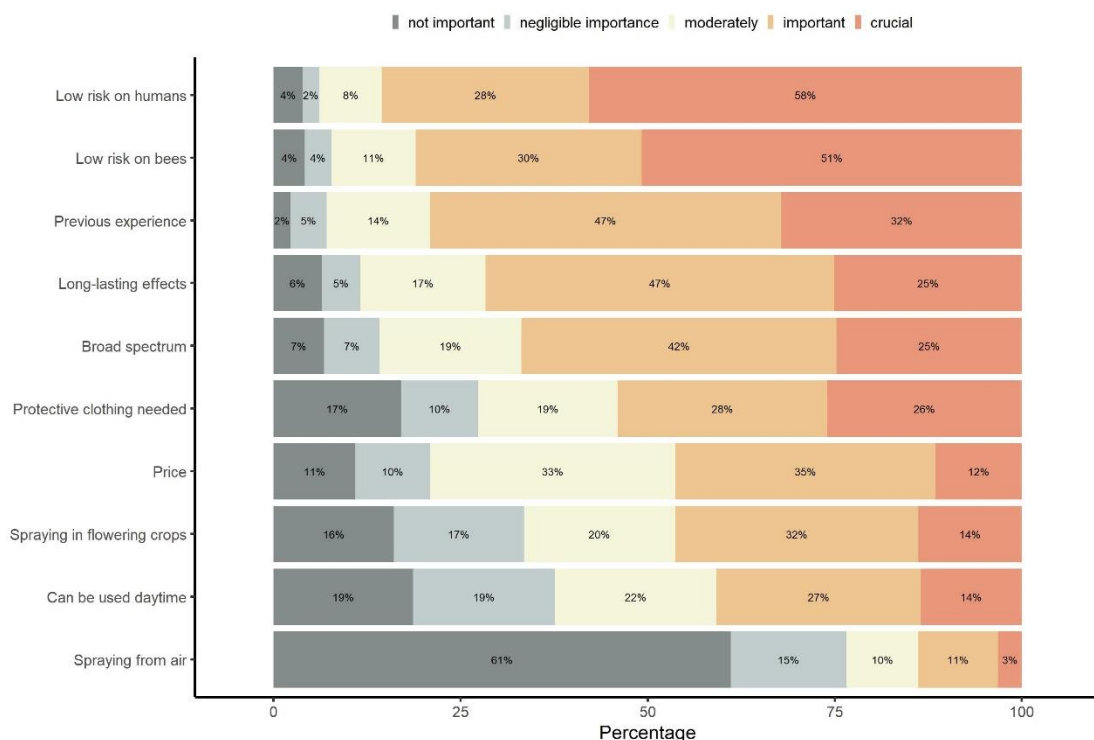

269  
 270 **Figure 3.** Relative frequency (%) of respondents' opinions on how important different  
 271 considerations are when choosing an insecticide. The response is colour-coded as  
 272 follows: dark grey – not important, light grey – negligible importance, light yellow –  
 273 moderately, light orange – important, dark orange – crucial.

274  
 275 Of those who used pesticides, 143 (46.0%) thought that banning neonicotinoids  
 276 in the EU impacted their management practices, and 218 (70.1%) used at a minimum one

277 acetamiprid-containing insecticides. Most users (55.2%) consider Mospilan (an  
278 acetamiprid-containing insecticide) indispensable. Of those who used Mospilan, 124  
279 (56.11%) use it together with other pesticides, mostly with fungicides.

280

### 281 **3.2 Plant protection habits and the protection of pollinators of garden owners**

282 Of all questionnaire respondents, 302 (65.2%) had less than one hectare of land and 171  
283 (56.6%) of home garden owners used pesticides on their land. The use of pesticides was  
284 considered acceptable by most garden owners, and 34.5% and 31.6% of them even  
285 thought it was important or crucially important, respectively. However, a significantly  
286 lower proportion of garden owners than of larger-scale farmers used pesticides (Chi-  
287 squared = 42.455, p-value <0.001) and a significantly higher proportion of home garden  
288 owners than of large-scale farmers believed that pesticide-free farming is achievable  
289 (Chi-squared = 3.593, p-value = 0.029).

290 The home garden owners who responded to our questionnaire specified that  
291 widespread use of pesticides, habitat loss due to agriculture and intensive agricultural  
292 production were the three most likely threats for wild pollinators (**Figure 4**), whilst they  
293 thought the appearance of invasive species was the least significant. Nonetheless, this  
294 factor was labelled as crucial by over half of the respondents (**Figure 4**). Of these garden  
295 owners, 259 (85.8%) recognise that widespread use of pesticides is a crucial problem for  
296 wild pollinators and 87.7% have heard that certain pesticides that are considered safe may  
297 also harm these insects. A significantly higher proportion of home garden owners than of  
298 large-scale farmers assumed that the conversion of agricultural production can slow down  
299 the depletion of pollinator populations (Chi-squared = 10.998, p-value = <0.001).

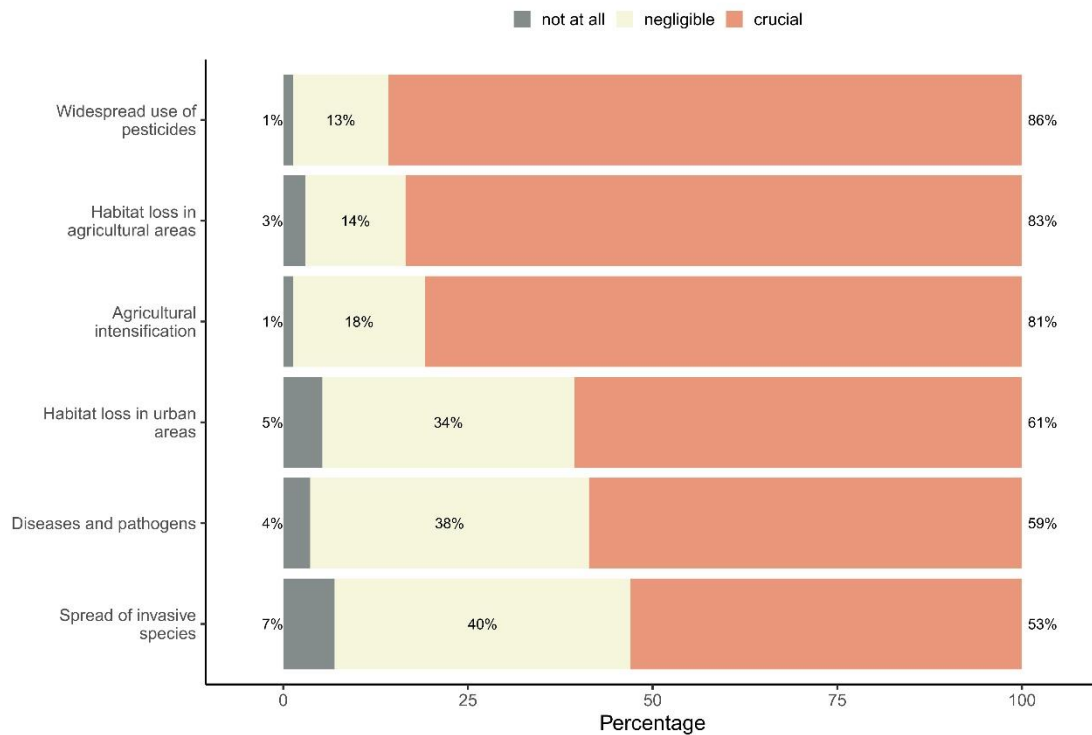

300

301 **Figure 4.** Relative frequency (%) of garden owners' (with less than 1-hectare of land)

302 opinions about the importance of factors that may threaten wild pollinators. The

303 response is colour-coded as follows: grey – not at all, yellow – negligible, orange –

304 crucial.

305

306 Of the garden owners, 81.1% carried out actions aimed at supporting wild

307 pollinators. The examined sociodemographic and farming habits did not show a strong

308 correlation with whether or not pollinators were supported (and neither did they with each

309 other); yet the highest significant correlation with pollinator support was the growers'

310 pesticide use ( $p < 0.05$ , Spearman's  $Rho = -0.22$ ) (**Supporting Information S7**). The

311 GBM model suggested that the best predictors for supporting pollinators were whether

312 garden owners had promoted biocontrol (relative influence: 38.85) and garden owners'

313 age (relative influence: 26.34) (**Figure 5**). This model had relatively high accuracy (0.82),



314 and sensitivity (0.96) though only a moderate AUC (0.73), and very low specificity (0.18)  
315 **(Supporting Information S8).**

316 The proportion of those who supported pollinators was not significantly different  
317 between home garden owners and large-scale farmers (Chi-squared = 0.856, p-value =  
318 0.178). A significantly higher proportion of pesticide-free garden owners supported  
319 pollinators than pesticide-using garden owners (Chi-squared = 13.159, p-value = <0.001).

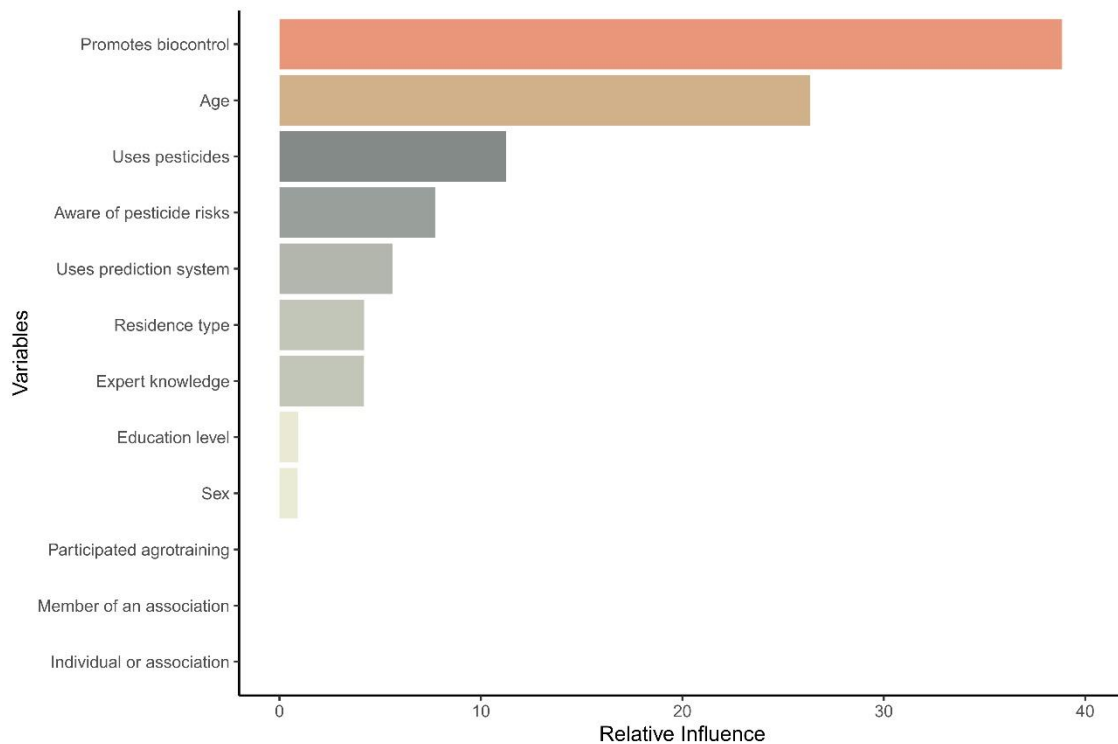

320  
321 **Figure 5.** The relative influence of factors generated from the Gradient Boosting  
322 Machine (GBM) model for predicting whether or not garden owners support wild  
323 pollinators.

324  
325 Among home garden owners, the most common activities to support wild  
326 pollinators were to provide additional food sources (37.3%) (primarily by pollinator-  
327 friendly flowers) and natural habitat improvement (35.7%) (e.g. wildflower strips).  
328 Providing artificial habitat (19.9%) (e.g. bee hotels) and water (4.1%) were other forms

329 of support. In some cases (3.1%), growers claimed they support pollinators without  
330 providing additional information. One respondent actively educated the neighbouring  
331 areas about the importance of wild pollinators and how to protect them.

332

#### 333 **4 DISCUSSION**

334 In this study, we conducted an online survey in Hungary to investigate pesticide  
335 application practices of plant growers, particularly of home garden owners and their  
336 dependence on pesticides. Additionally, we also investigated the garden owners'  
337 perspectives on environmental issues related to pesticides and their attitude to mitigating  
338 pollinator declines.

339 Supporting our first hypothesis, we found that almost half of those who completed  
340 our questionnaire claimed that general pesticide use is unavoidable in farming. This  
341 proportion was even higher amongst those who actively used pesticides.

342 We found that expert knowledge was the best predictor of whether pesticides were  
343 used in farming, and this was disproportionately important for large-scale farmers. Most  
344 of the respondents who usually consult an expert, or who are experts themselves with  
345 plant protection qualifications (e.g. plant doctor degree), use pesticides. Thus, farmers  
346 rely on (external) expert information for making decisions and embracing alternative pest  
347 management practices this expert advice may be essential for encouraging growers to  
348 move away from pesticide-based farming. The economic value of pollination ecosystem  
349 services <sup>59</sup> and the yield losses related to pollinator decline <sup>60</sup> may be the most important  
350 points to raise in addition to emphasising that maintaining pollinator populations requires  
351 drastic reduction or complete abandonment of pesticide use <sup>61,62</sup>. However, farmers who  
352 grow crops that are not dependent on insect pollination and do not face the negative

353 effects of their decline may be sceptical about the importance of this issue. Nonetheless,  
354 in our study, 40% of large-scale farmers personally observed pollinator declines and over  
355 70% of them believed that transitional agriculture can mitigate pollinator declines. These  
356 results suggest that most growers are aware of the problem, yet their high level of  
357 dependency on pesticides implies a distrust or lack of knowledge of alternative methods.  
358 Also, for some crops no satisfactory management alternatives that protect yields are  
359 available. Environmental education, subsidising ecological management (e.g. agri-  
360 environment schemes supporting less intensive farming), and effective biodiversity offset  
361 schemes can play an important role, especially when combined with expert advice.  
362 However, the accessibility of this information varies from country to country <sup>63</sup>, and so  
363 increasing the ease with which stakeholders can access this information is key in the  
364 transition process. Moreover, pressure from the agricultural chemical lobby and the  
365 distrust among agricultural advisers of alternative plant protection measures can  
366 strengthen market resistance <sup>64</sup>, which can slow down the dissemination of ecologically  
367 friendly practices.

368         The second-best predictor of whether respondents used pesticides or not was  
369 gender. Despite genders being evenly distributed among respondents, almost twice as  
370 many men used pesticides as women. Indeed, in many respects, for instance, in eating  
371 habits (such as food-selecting behaviour), women are more health-conscious than men <sup>65</sup>,  
372 which, we can speculate, may be reflected in differences in attitudes towards pesticide  
373 use (e.g. Wang et al. <sup>66</sup>). Similar behavioural backgrounds may have created the emerging  
374 between-gender imbalance in our study.

375         Besides showing patterns of general pesticide use, our survey showed that the  
376 most important aspect for specifically choosing insecticides was the level of their effects

377 on humans and bees. This suggests that most users were aware that insecticides can cause  
378 adverse, mostly sublethal, effects both in humans<sup>9</sup> and non-target insects<sup>67,68</sup>. This was  
379 further underpinned by the large proportion of respondents (86.5%) who were aware that  
380 even insecticides labelled as harmless to insect pollinators can nevertheless have negative  
381 effects. Previous experience with a particular insecticide also influenced users' choices.  
382 Repeatedly using well-known pesticides, however, may relax rigorous portioning habits  
383 which, in turn, may lead to insecticide overuse<sup>69</sup>. This fixed choice may also lead to brand  
384 fidelity, which, consequently, may prevent experimenting with alternative, more  
385 environmentally friendly, pesticides.

386       Indeed, despite scientific advice calling for the banning of all neonicotinoids<sup>70</sup>,  
387 this study showed that most respondents already experience the effects of the present ban  
388 on neonicotinoids and that they heavily depend on the use of acetamiprid, which is  
389 currently the only one freely available in the EU. This may lead to a higher demand for  
390 acetamiprid-containing insecticides among plant growers in the coming years<sup>71</sup>.  
391 Acetamiprid, like all neonicotinoids, can persist in the tissues of treated plants<sup>45</sup> and its  
392 half-life can reach 450 days in soil<sup>72</sup> inducing sublethal effects in beneficial organisms  
393<sup>71</sup>, such as pollinators. On top of this, we also found that many of those plant growers who  
394 used acetamiprid-containing pesticides co-applied them in combination with other  
395 agrochemicals. Although concerns have been raised about the negative effects of  
396 cocktails of pesticides on the fitness of non-target insects (e.g. Gill et al.<sup>73</sup>; Williamson  
397 and Wright<sup>74</sup>), in our study the most extreme example was one home garden owner who  
398 used Mospilan along with seven additional fungicides. Based on our results, we can  
399 assume that a substantial proportion of Hungarian growers have not yet attempted to  
400 reduce insecticides. Similarly to when aiming to reduce pesticides at large, the publicising

401 of relevant methodological advances or alternative technologies is likely to be critical to  
402 achieving a reduction in insecticides use and a transition to ecological-friendly farming.

403

#### 404 **4.1 Home gardens as ecological traps**

405 Home gardens could be transformed into pesticide-free cultivation more quickly than  
406 larger-scale farming areas, but, according to our study, Hungarian garden owners seem to  
407 be reluctant of this conversion. Contrary to our expectations, pesticide use was  
408 widespread among gardeners, and almost all respondents who considered that the issue  
409 of pesticides causing harm to wild pollinators was unimportant themselves used  
410 pesticides. Even those garden owners who acknowledged that the widespread use of  
411 pesticides was a crucial problem for pollinators and have heard that certain pesticides  
412 considered safe may also be harmful to wild pollinators kept using them. Hence, our  
413 second hypothesis was not supported. Although a significantly greater proportion of home  
414 gardeners than of large-scale farmers believed that pesticide-free farming is achievable.  
415 Only 43.4% of the garden owners who completed our questionnaire grow plants  
416 pesticide-free, and more than half of the garden owners who produce fruits and vegetables  
417 for themselves and are not profit-oriented, use pesticides. These numbers are alarming  
418 and suggest that despite the known negative effects of pesticide use and the potential  
419 benefits of pesticide-free management, garden owners favour conventional approaches  
420 including the use of pesticides. The proportion of pesticide-free gardeners is similar to  
421 that found in Austria and Poland (pesticide-free: 41.0-51.7%)<sup>75</sup> among small-scale  
422 gardeners. In another survey conducted in the UK, only 30% of small gardeners did not  
423 use pesticides<sup>76</sup>. However, the comparability of these results may be hampered by the  
424 differences in the definition of a ‘home garden’ among surveys.

425           The majority of those who completed the questionnaire supported pollinators. Our  
426 model indicated that whether or not one promoted biocontrol was the best predictor of  
427 whether a garden owner also supported wild pollinators. However, due to the skew in  
428 number towards pollinator-supporting garden owners, the model specificity was low,  
429 making this prediction unreliable. A significantly higher proportion of pesticide-free  
430 garden owners supported pollinators than of those who used pesticides, supporting our  
431 third hypothesis. The most common means to support wild pollinators were to provide  
432 pollinator-friendly flowers and many respondents provided bee hotels as a means of  
433 support. These two approaches are probably widespread because in recent years  
434 pollinators (particularly wild bees) have become an increasingly important part of  
435 environmental education programs in the European Union <sup>77</sup>, including Hungary (e.g. the  
436 annual ‘Pollinators day’ event). Yet, Schmied et al. <sup>78</sup> demonstrated that urbanised areas,  
437 whilst being safe habitats in some cases (e.g. Theodorou et al. <sup>41</sup>), can also act as  
438 ecological traps (e.g. Campioni et al. <sup>79</sup>; Lehtonen et al. <sup>80</sup>) for insects in other cases.  
439 Indeed, although home gardens lure insect pollinators, pesticides are used in many of  
440 those gardens, contaminating the nectar and pollen of flowers <sup>81</sup> which, in turn, can have  
441 deleterious effects on pollinators’ fitness. Thus, these non-pesticide-free gardens act as  
442 ecological traps for insect pollinators. For that reason, plant growers should be  
443 encouraged and motivated to produce their vegetables and fruits pesticide-free. Garden  
444 owners should be aware that to fully support pollinators in urban areas, pesticide use  
445 should be reduced or fully abandoned. Realising the potential benefits of urban gardens  
446 as biodiversity refuges, and the problems that pesticide use brings about for meeting this  
447 target, drive an increasing number of European countries to aim to ban plant protection  
448 products in private areas in addition to public areas <sup>7</sup>. Home growers could also be

449 discouraged from buying and using these products if they are removed from being freely  
450 available on supermarket shelves, as recently proposed in the UK <sup>82</sup>.

451

#### 452 **4.2 Study limits and future perspectives**

453 There are some limitations to our work. The respondents of the questionnaire were not  
454 chosen randomly. Our population is a subsample of those who were aware of the  
455 announcement and voluntarily took part in the study. The questionnaire could only be  
456 completed online, therefore, it had a lower chance to reach the eastern part of the country  
457 where there is a lower rate of internet access <sup>83</sup>. Most of the large-scale agriculture takes  
458 place in Eastern Hungary, hence large-scale farmers may be underrepresented.  
459 Nonetheless, our questionnaire was completed by a sufficiently large number of people  
460 such that it should represent general plant protection habits and trends in pesticide use  
461 among Hungarian growers.

462 Our study could have provided further insights if more landscape and biodiversity  
463 variables had been available. However, asking for providing these may have been  
464 demanding for farmers and so reduced response rates. Thus, unfortunately, we had to  
465 compromise on this issue.

466 Furthermore, the generalisability of the result is limited by the fact that the survey  
467 was conducted only among Hungarian plant growers, although it does provide a useful  
468 case study in which results are not compounded by inter-country factors. Countries at a  
469 similar development level and using similar agricultural practices should also be involved  
470 in future studies to expand understanding of how pesticide use patterns and attitudes apply  
471 across a wider geographic scale.

472

### 473 **4.3 Conclusions and future perspectives**

474 Additional questions in similar studies could provide deeper insight into farmers'  
475 practices, for instance, the chemical structure of pesticides used, whether they were  
476 synthetic or organic, or which organism were they used against.

477 One of the most pressing questions is whether home garden owners really want to  
478 convert to a completely pesticide-free plant growing. Focused research is needed to  
479 understand the willingness and motivations of garden owners for making this transition  
480 and why (if so) they prefer to continue conventional practices. Additionally,  
481 environmental education should establish the ecological foundations of pollinator-  
482 friendly gardens and promote their local and global benefits. In particular, demonstration  
483 gardens and demonstration farms should be set up which could demonstrate and teach  
484 pesticide-free farming to plant growers. Alternatively, incentives and direct subsidies  
485 could be provided to those who abandon the use of pesticides. Moreover, pesticide-free  
486 farming could be advocated through mobile applications and social recognition, or  
487 through granting 'pollination friendly' certification to home gardens. These gardens could  
488 also be involved in biomonitoring programs to further strengthen links between nature  
489 and garden owners.

490 However, at present, due to the unintentionally introduced pesticide pollution in  
491 gardens<sup>45</sup>, not even the exact magnitude of exposure of pollinators to chemical pesticides  
492 can be assessed. Therefore, future research should focus on this invisible contamination  
493 and its effects on the assemblages of garden insects. From the side of decision-makers, to  
494 deal with this issue, clear labelling practices should be requested from suppliers to  
495 indicate whether or not products have come from pesticide-free farms (e.g. Ecolabel  
496 Index<sup>84</sup>). The amount of freely available plant protection products should be reduced,



497 particularly those available in supermarkets, to discourage direct and indirect pesticide  
498 pollution in the gardens.

499         Driving large-scale farmers and home garden owners toward pesticide-free  
500 farming however may need different approaches. Whereas large scale farmers mostly rely  
501 on expert advice, and therefore advisers should inform them about pesticide-free  
502 practices, home gardeners may more heavily rely on conventional information channels  
503 (such as social media and personal networks).

504         The attitude of Hungarian plant growers can provide a general insight into the  
505 viewpoint of other Central and Eastern European countries and similar surveys would be  
506 needed across Europe. Since survey approaches, similar to ours, through directed  
507 questions about pesticide use habits, help us to better understand plant growers'  
508 motivations, we hope this survey proves to be useful as an example for further online  
509 questionnaires. The information gained then can help to find solutions towards a  
510 pesticide-free future.

511

## 512 **ACKNOWLEDGEMENTS**

513 We are grateful to Zoltán Tóth for pointing us towards conducting a questionnaire-based  
514 study. We also thank Marco Ferrante and Nick Littlewood for their comments on the  
515 manuscript. Zsófia Varga-Szilay was supported by the ÚNKP20-3 New National  
516 Excellence Program of the Ministry for Innovation and Technology from the source of  
517 the National Research, Development and Innovation Fund. Gábor Pozsgai was supported  
518 by the FCT-UIDP/00329/2020 funding and the research pluriannual funds for cE3c (FCT-  
519 UIDB/00329/2020).

520

521 **AUTHOR CONTRIBUTIONS**

522 Zsófia Varga-Szilay conceived and designed the study. The questionnaire was created  
523 and data were collected by Zsófia Varga-Szilay. Analysis was performed by Zsófia  
524 Varga-Szilay and Gábor Pozsgai. The manuscript was written by Zsófia Varga-Szilay and  
525 Gábor Pozsgai. Both authors read and approved the final manuscript.

526

527 **ORCID NUMBER OF AUTHORS**

528 Zsófia Varga-Szilay: <https://orcid.org/0000-0001-9712-7654>

529 Gábor Pozsgai: <https://orcid.org/0000-0002-2300-6558>

530

531 **CONFLICT OF INTEREST DECLARATION**

532 The authors declare no competing interests.

533

534 **DATA AND CODE AVAILABILITY STATEMENT**

535 The data and the underlying computer code are available in the GitHub repository

536 [https://github.com/zsvargaszilay/pesticide\\_questionnaire](https://github.com/zsvargaszilay/pesticide_questionnaire)

537 **REFERENCES**

- 538 1 Hallmann CA, Sorg M, Jongejans E, Siepel H, Hofland N, Schwan H, *et al.*,  
539 More than 75 percent decline over 27 years in total flying insect biomass in  
540 protected areas, *PLOS ONE* **12**:e0185809, Public Library of Science (2017).
- 541 2 Zattara EE and Aizen MA, Worldwide occurrence records suggest a global  
542 decline in bee species richness, *One Earth* **4**:114–123 (2021).
- 543 3 Dangles O and Casas J, Ecosystem services provided by insects for achieving  
544 sustainable development goals, *Ecosyst Serv* **35**:109–115 (2019).
- 545 4 Vanbergen AJ and the Insect Pollinators Initiative, Threats to an ecosystem  
546 service: pressures on pollinators, *Front Ecol Environ* **11**:251–259 (2013).
- 547 5 Hanley N, Breeze TD, Ellis C, and Goulson D, Measuring the economic value of  
548 pollination services: Principles, evidence and knowledge gaps, *Ecosyst Serv*  
549 **14**:124–132 (2015).
- 550 6 Baldock KCR, Opportunities and threats for pollinator conservation in global  
551 towns and cities, *Curr Opin Insect Sci* **38**:63–71 (2020).
- 552 7 Goulson D and Nicholls E, Anthropogenic influences on bee foraging, *Science*  
553 **375**:970–972, American Association for the Advancement of Science (2022).
- 554 8 Potts SG, Imperatriz-Fonseca V, Ngo HT, Aizen MA, Biesmeijer JC, Breeze  
555 TD, *et al.*, Safeguarding pollinators and their values to human well-being,  
556 *Nature* **540**:220–229, Nature Publishing Group (2016).
- 557 9 Rani L, Thapa K, Kanojia N, Sharma N, Singh S, Grewal AS, *et al.*, An  
558 extensive review on the consequences of chemical pesticides on human health  
559 and environment, *J Clean Prod* **283**:124657 (2021).

- 560 10 Zaller JG, Pesticide Impacts on the Environment and Humans, ed. by Zaller JG,  
561 Daily Poison : Pesticides - an Underestimated Danger, Springer International  
562 Publishing, Cham, pp. 127–221 (2020).
- 563 11 FAO, Pesticides use, pesticides trade and pesticides indicators. Global, regional  
564 and country trends, 1990–2019., *FAOSTAT Anal Brief Ser No 29 Rome:22*  
565 (2021).
- 566 12 Botías C, David A, Horwood J, Abdul-Sada A, Nicholls E, Hill E, *et al.*,  
567 Neonicotinoid residues in wildflowers, a potential route of chronic exposure for  
568 bees, *Environ Sci Technol* **49**:12731–12740, American Chemical Society (2015).
- 569 13 Krupke CH, Hunt GJ, Eitzer BD, Andino G, and Given K, Multiple routes of  
570 pesticide exposure for honey bees living near agricultural fields, ed. by Smagghe  
571 G, *PLoS ONE* **7**:e29268 (2012).
- 572 14 Pisa LW, Amaral-Rogers V, Belzunces LP, Bonmatin JM, Downs CA, Goulson  
573 D, *et al.*, Effects of neonicotinoids and fipronil on non-target invertebrates,  
574 *Environ Sci Pollut Res* **22**:68–102 (2015).
- 575 15 Raimets R, Karise R, Mänd M, Kaart T, Ponting S, Song J, *et al.*, Synergistic  
576 interactions between a variety of insecticides and an ergosterol biosynthesis  
577 inhibitor fungicide in dietary exposures of bumble bees (*Bombus terrestris* L.),  
578 *Pest Manag Sci* **74**:541–546 (2018).
- 579 16 Siviter H, Bailes EJ, Martin CD, Oliver TR, Koricheva J, Leadbeater E, *et al.*,  
580 Agrochemicals interact synergistically to increase bee mortality, *Nature*  
581 **596**:389–392 (2021).

- 582 17 Wernecke A and Castle D, Effects of tank mixtures of plant protection products  
583 on honey bees and possible physiological interactions, *J Für Kult*:154-161  
584 Seiten, Journal für Kulturpflanzen (2020).
- 585 18 Brühl CA, Bakanov N, Köthe S, Eichler L, Sorg M, Hörren T, *et al.*, Direct  
586 pesticide exposure of insects in nature conservation areas in Germany, *Sci Rep*  
587 **11**:24144 (2021).
- 588 19 Main AR, Hladik ML, Webb EB, Goynes KW, and Mengel D, Beyond  
589 neonicotinoids – Wild pollinators are exposed to a range of pesticides while  
590 foraging in agroecosystems, *Sci Total Environ* **742**:140436 (2020).
- 591 20 Sánchez-Bayo F and Wyckhuys KAG, Worldwide decline of the entomofauna:  
592 A review of its drivers, *Biol Conserv* **232**:8–27 (2019).
- 593 21 Tooker JF and Pearsons KA, Newer characters, same story: neonicotinoid  
594 insecticides disrupt food webs through direct and indirect effects, *Curr Opin*  
595 *Insect Sci* **46**:50–56 (2021).
- 596 22 Emmerson M, Morales MB, Oñate JJ, Batáry P, Berendse F, Liira J, *et al.*,  
597 Chapter two - How agricultural intensification affects biodiversity and  
598 ecosystem services, ed. by Dumbrell AJ, Kordas RL, and Woodward G,  
599 *Advances in Ecological Research*, Academic Press, pp. 43–97 (2016).
- 600 23 European Commission, Communication from the Commission to the European  
601 Parliament, the Council, the European Economic and Social Committee and the  
602 Committee of the Regions: A Farm to Fork Strategy for a fair, healthy and  
603 environmentally-friendly food system COM/2020/381 final (2020).

- 604 24 EPRS, Farming without plant protection products. Can we grow without using  
605 herbicides, fungicides and insecticides? In: Service EEPR (ed), Publications  
606 Office, Panel for the Future of Science and Technology, PE 634.416 (2019).
- 607 25 Lechenet M, Dessaint F, Py G, Makowski D, and Munier-Jolain N, Reducing  
608 pesticide use while preserving crop productivity and profitability on arable  
609 farms, *Nat Plants* **3**:1–6, Nature Publishing Group (2017).
- 610 26 Pecenka JR, Ingwell LL, Foster RE, Krupke CH, and Kaplan I, IPM reduces  
611 insecticide applications by 95% while maintaining or enhancing crop yields  
612 through wild pollinator conservation, *Proc Natl Acad Sci* **118**:e2108429118,  
613 National Academy of Sciences (2021).
- 614 27 European Commission, Organic farming statistics.  
615 [https://ec.europa.eu/eurostat/statistics-](https://ec.europa.eu/eurostat/statistics-explained/index.php?title=Organic_farming_statistics)  
616 [explained/index.php?title=Organic\\_farming\\_statistics](https://ec.europa.eu/eurostat/statistics-explained/index.php?title=Organic_farming_statistics) [accessed 18 February  
617 2022].
- 618 28 Willer H and Lernoud J, The world of organic agriculture. Statistics and  
619 emerging trends 2018, Research Institute of Organic Agriculture FiBL and  
620 IFOAM-Organics International (2018).
- 621 29 Grass I, Loos J, Baensch S, Batáry P, Librán-Embid F, Ficiciyan A, *et al.*, Land-  
622 sharing/-sparing connectivity landscapes for ecosystem services and biodiversity  
623 conservation, *People Nat* **1**:262–272 (2019).
- 624 30 Gurr GM, Wratten SD, Landis DA, and You M, Habitat management to  
625 suppress pest populations: progress and prospects, *Annu Rev Entomol* **62**:91–109  
626 (2017).

- 627 31 Pywell RF, Heard MS, Woodcock BA, Hinsley S, Ridding L, Nowakowski M,  
628 *et al.*, Wildlife-friendly farming increases crop yield: evidence for ecological  
629 intensification, *Proc R Soc B Biol Sci* **282**:20151740, Royal Society (2015).
- 630 32 Brühl CA, Zaller JG, Liess M, and Wogram J, The rejection of synthetic  
631 pesticides in organic farming has multiple benefits, *Trends Ecol Evol* **37**:113–  
632 114 (2022).
- 633 33 Saqib HSA, Chen J, Chen W, Pozsgai G, Akutse KS, Ashraf MF, *et al.*, Local  
634 management and landscape structure determine the assemblage patterns of  
635 spiders in vegetable fields, *Sci Rep* **10**:15130 (2020).
- 636 34 Tschardtke T, Grass I, Wanger TC, Westphal C, and Batáry P, Beyond organic  
637 farming – harnessing biodiversity-friendly landscapes, *Trends Ecol Evol*  
638 **36**:919–930 (2021).
- 639 35 Tschardtke T, Grass I, Wanger TC, Westphal C, and Batáry P, Restoring  
640 biodiversity needs more than reducing pesticides, *Trends Ecol Evol* **37**:115–116  
641 (2022).
- 642 36 Baldock KCR, Goddard MA, Hicks DM, Kunin WE, Mitschunas N, Morse H, *et*  
643 *al.*, A systems approach reveals urban pollinator hotspots and conservation  
644 opportunities, *Nat Ecol Evol* **3**:363–373, Nature Publishing Group (2019).
- 645 37 Hülsmann M, von Wehrden H, Klein A-M, and Leonhardt SD, Plant diversity  
646 and composition compensate for negative effects of urbanization on foraging  
647 bumble bees, *Apidologie* **46**:760–770 (2015).
- 648 38 Holzschuh A, Steffan-Dewenter I, and Tschardtke T, Agricultural landscapes  
649 with organic crops support higher pollinator diversity, *Oikos* **117**:354–361  
650 (2008).

- 651 39 Wray JC and Elle E, Flowering phenology and nesting resources influence  
652 pollinator community composition in a fragmented ecosystem, *Landsc Ecol*  
653 **30**:261–272 (2015).
- 654 40 Hall DM, Camilo GR, Tonietto RK, Ollerton J, Ahrné K, Arduser M, *et al.*, The  
655 city as a refuge for insect pollinators, *Conserv Biol* **31**:24–29 (2017).
- 656 41 Theodorou P, Radzevičiūtė R, Lentendu G, Kahnt B, Husemann M, Bleidorn C,  
657 *et al.*, Urban areas as hotspots for bees and pollination but not a panacea for all  
658 insects, *Nat Commun* **11**:576 (2020).
- 659 42 Sirohi MH, Jackson J, Edwards M, and Ollerton J, Diversity and abundance of  
660 solitary and primitively eusocial bees in an urban centre: a case study from  
661 Northampton (England), *J Insect Conserv* **19**:487–500 (2015).
- 662 43 Baldock KCR, Goddard MA, Hicks DM, Kunin WE, Mitschunas N, Osgathorpe  
663 LM, *et al.*, Where is the UK’s pollinator biodiversity? The importance of urban  
664 areas for flower-visiting insects, *Proc R Soc B Biol Sci* **282**:20142849, Royal  
665 Society (2015).
- 666 44 Wenzel A, Grass I, Belavadi VV, and Tschardt T, How urbanization is driving  
667 pollinator diversity and pollination – A systematic review, *Biol Conserv*  
668 **241**:108321 (2020).
- 669 45 Lentola A, David A, Abdul-Sada A, Tapparo A, Goulson D, and Hill EM,  
670 Ornamental plants on sale to the public are a significant source of pesticide  
671 residues with implications for the health of pollinating insects, *Environ Pollut*  
672 **228**:297–304 (2017).



- 673 46 Botías C, David A, Hill EM, and Goulson D, Quantifying exposure of wild  
674 bumblebees to mixtures of agrochemicals in agricultural and urban landscapes,  
675 *Environ Pollut* **222**:73–82 (2017).
- 676 47 Garden Organic, France declares public spaces pesticide free - private gardens  
677 will follow. [https://www.gardenorganic.org.uk/news/france-declares-public-](https://www.gardenorganic.org.uk/news/france-declares-public-spaces-pesticide-free)  
678 [spaces-pesticide-free](https://www.gardenorganic.org.uk/news/france-declares-public-spaces-pesticide-free) [accessed 1 March 2022].
- 679 48 PAN Europe, Pesticide Action Week 2019: No more pesticides in non-  
680 agricultural areas!, *PAN Eur*, 20 March 2019. [https://www.pan-](https://www.pan-europe.info/press-releases/2019/03/pesticide-action-week-2019-no-more-pesticides-non-agricultural-areas)  
681 [europe.info/press-releases/2019/03/pesticide-action-week-2019-no-more-](https://www.pan-europe.info/press-releases/2019/03/pesticide-action-week-2019-no-more-pesticides-non-agricultural-areas)  
682 [pesticides-non-agricultural-areas](https://www.pan-europe.info/press-releases/2019/03/pesticide-action-week-2019-no-more-pesticides-non-agricultural-areas) [accessed 14 March 2022].
- 683 49 PAN Europe, Pesticide Free Towns, n.d. [https://www.pan-](https://www.pan-europe.info/campaigns/pesticide-free-towns)  
684 [europe.info/campaigns/pesticide-free-towns](https://www.pan-europe.info/campaigns/pesticide-free-towns) [accessed 7 March 2022].
- 685 50 European Commission, Member States: Trends. Trend in use and risk of  
686 chemical and more hazardous pesticides.  
687 [https://ec.europa.eu/food/plants/pesticides/sustainable-use-pesticides/farm-fork-](https://ec.europa.eu/food/plants/pesticides/sustainable-use-pesticides/farm-fork-targets-progress/member-states-trends_en)  
688 [targets-progress/member-states-trends\\_en](https://ec.europa.eu/food/plants/pesticides/sustainable-use-pesticides/farm-fork-targets-progress/member-states-trends_en) [accessed 20 January 2022].
- 689 51 Revelle W, psych: Procedures for psychological, psychometric, and personality  
690 research, Evanston, Illinois (2021).
- 691 52 Wei T and Simko V, R package “corrplot”: Visualization of a correlation matrix  
692 (2021).
- 693 53 Greenwell B, Boehmke B, Cunningham J, and Developers G, gbm: Generalized  
694 boosted regression models (2020).
- 695 54 Kuhn M, caret: Classification and regression training (2021).

- 696 55 Kuhn M and Vaughan D, yardstick: Tidy characterizations of model  
697 performance (2021).
- 698 56 Bryer J and Speerschneider K, likert: Analysis and visualization likert items  
699 (2016).
- 700 57 Pebesma E, Simple features for r: Standardized support for spatial vector data, *R*  
701 *J* **10**:439–446 (2018).
- 702 58 R Core Team, R: A language and environment for statistical computing, Vienna,  
703 Austria (2021).
- 704 59 Porto RG, de Almeida RF, Cruz-Neto O, Tabarelli M, Viana BF, Peres CA, *et*  
705 *al.*, Pollination ecosystem services: A comprehensive review of economic  
706 values, research funding and policy actions, *Food Secur* **12**:1425–1442 (2020).
- 707 60 Fijen TPM, Scheper JA, Vogel C, van Ruijven J, and Kleijn D, Insect  
708 pollination is the weakest link in the production of a hybrid seed crop, *Agric*  
709 *Ecosyst Environ* **290**:106743 (2020).
- 710 61 Geiger F, Bengtsson J, Berendse F, Weisser WW, Emmerson M, Morales MB,  
711 *et al.*, Persistent negative effects of pesticides on biodiversity and biological  
712 control potential on European farmland, *Basic Appl Ecol* **11**:97–105 (2010).
- 713 62 Jacquet F, Jeuffroy M-H, Jouan J, Le Cadre E, Litrico I, Malausa T, *et al.*,  
714 Pesticide-free agriculture as a new paradigm for research, *Agron Sustain Dev*  
715 **42**:8 (2022).
- 716 63 Wyckhuys KAG, Pozsgai G, Lovei GL, Vasseur L, Wratten SD, Gurr GM, *et*  
717 *al.*, Global disparity in public awareness of the biological control potential of  
718 invertebrates, *Sci Total Environ* **660**:799–806 (2019).

- 719 64 Villemaine R, Compagnone C, and Falconnet C, The social construction of  
720 alternatives to pesticide use: A study of biocontrol in Burgundian viticulture,  
721 *Sociol Rural* **61**:74–95 (2021).
- 722 65 Wardle J, Haase AM, Steptoe A, Nillapun M, Jonwutiwes K, and Bellis F,  
723 Gender differences in food choice: The contribution of health beliefs and  
724 dieting, *Ann Behav Med* **27**:107–116 (2004).
- 725 66 Wang W, Jin J, He R, and Gong H, Gender differences in pesticide use  
726 knowledge, risk awareness and practices in Chinese farmers, *Sci Total Environ*  
727 **590–591**:22–28 (2017).
- 728 67 Desneux N, Decourtye A, and Delpuech J-M, The sublethal effects of pesticides  
729 on beneficial arthropods, *Annu Rev Entomol* **52**:81–106 (2007).
- 730 68 Müller C, Impacts of sublethal insecticide exposure on insects — Facts and  
731 knowledge gaps, *Basic Appl Ecol* **30**:1–10 (2018).
- 732 69 Huang Y, Luo X, Tang L, and Yu W, The power of habit: does production  
733 experience lead to pesticide overuse?, *Environ Sci Pollut Res* **27**:25287–25296  
734 (2020).
- 735 70 Goulson D and 232 Signatories, Call to restrict neonicotinoids, *Science* **360**:973,  
736 American Association for the Advancement of Science (2018).
- 737 71 Varga-Szilay Z and Tóth Z, Is acetamiprid really not that harmful to bumblebees  
738 (Apidae: *Bombus* spp.)?, *Apidologie* **53**:2 (2022).
- 739 72 Goulson D, REVIEW: An overview of the environmental risks posed by  
740 neonicotinoid insecticides, ed. by Kleijn D, *J Appl Ecol* **50**:977–987 (2013).

- 741 73 Gill RJ, Ramos-Rodriguez O, and Raine NE, Combined pesticide exposure  
742 severely affects individual- and colony-level traits in bees, *Nature* **491**:105–108  
743 (2012).
- 744 74 Williamson SM and Wright GA, Exposure to multiple cholinergic pesticides  
745 impairs olfactory learning and memory in honeybees, *J Exp Biol* **216**:1799–1807  
746 (2013).
- 747 75 Voigt A, Latkowska M, Rutecka A, Ponizy L, Mizgajski A, Breuste J, *et al.*,  
748 Environmental behavior of urban allotment gardeners in Europe, *Landsc Flux*  
749 *Est Univ Life Sci Est*:78–82 (2015).
- 750 76 Resource Futures, Pesticide user habits survey 2013: public purchasing, use,  
751 storage, and disposal of pesticides in plant protection products (2013).
- 752 77 European Commission, EU Pollinators Initiative.  
753 [https://ec.europa.eu/environment/nature/conservation/species/pollinators/policy\\_](https://ec.europa.eu/environment/nature/conservation/species/pollinators/policy_en.htm)  
754 [en.htm](https://ec.europa.eu/environment/nature/conservation/species/pollinators/policy_en.htm) [accessed 14 February 2022].
- 755 78 Schmied H, Getrost L, Diestelhorst O, Maaßen G, and Gerhard L, Between  
756 perfect habitat and ecological trap: even wildflower strips mulched annually  
757 increase pollinating insect numbers in intensively used agricultural landscapes, *J*  
758 *Insect Conserv* (2022).
- 759 79 Campioni L, Marengo I, Román J, and D’Amico M, Mud-puddling on  
760 roadsides: a potential ecological trap for butterflies, *J Insect Conserv* **26**:131–  
761 134 (2022).
- 762 80 Lehtonen TK, Babic NL, Piepponen T, Valkeeniemi O, Borshagovski A-M, and  
763 Kaitala A, High road mortality during female-biased larval dispersal in an iconic  
764 beetle, *Behav Ecol Sociobiol* **75**:26 (2021).

- 765 81 Nicholls E, Botfás C, Rotheray EL, Whitehorn P, David A, Fowler R, *et al.*,  
766 Monitoring neonicotinoid exposure for bees in rural and peri-urban areas of the  
767 U.K. during the transition from pre- to post-moratorium, *Environ Sci Technol*  
768 **52**:9391–9402 (2018).
- 769 82 PAN UK, Pesticide Action Network UK. <https://www.pan-uk.org/> [accessed 28  
770 February 2022].
- 771 83 Központi Statisztikai Hivatal, A háztartások információs- és  
772 kommunikációs-eszköz-használatának főbb jellemzői.  
773 <https://www.ksh.hu/docs/hun/xftp/idoszaki/ikt/2020/01/index.html> [accessed 5  
774 April 2022].
- 775 84 Ecolabel Index - All ecolabels on food,  
776 <https://www.ecolabelindex.com/ecolabels/?st=category,food> [accessed 14  
777 February 2022].  
778

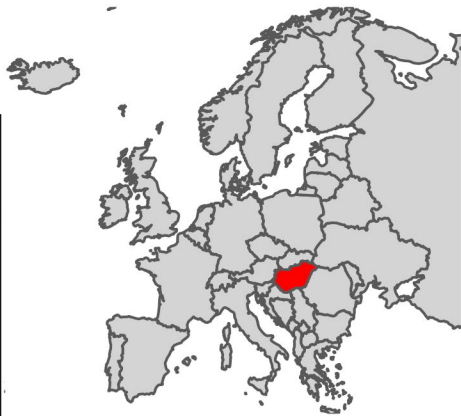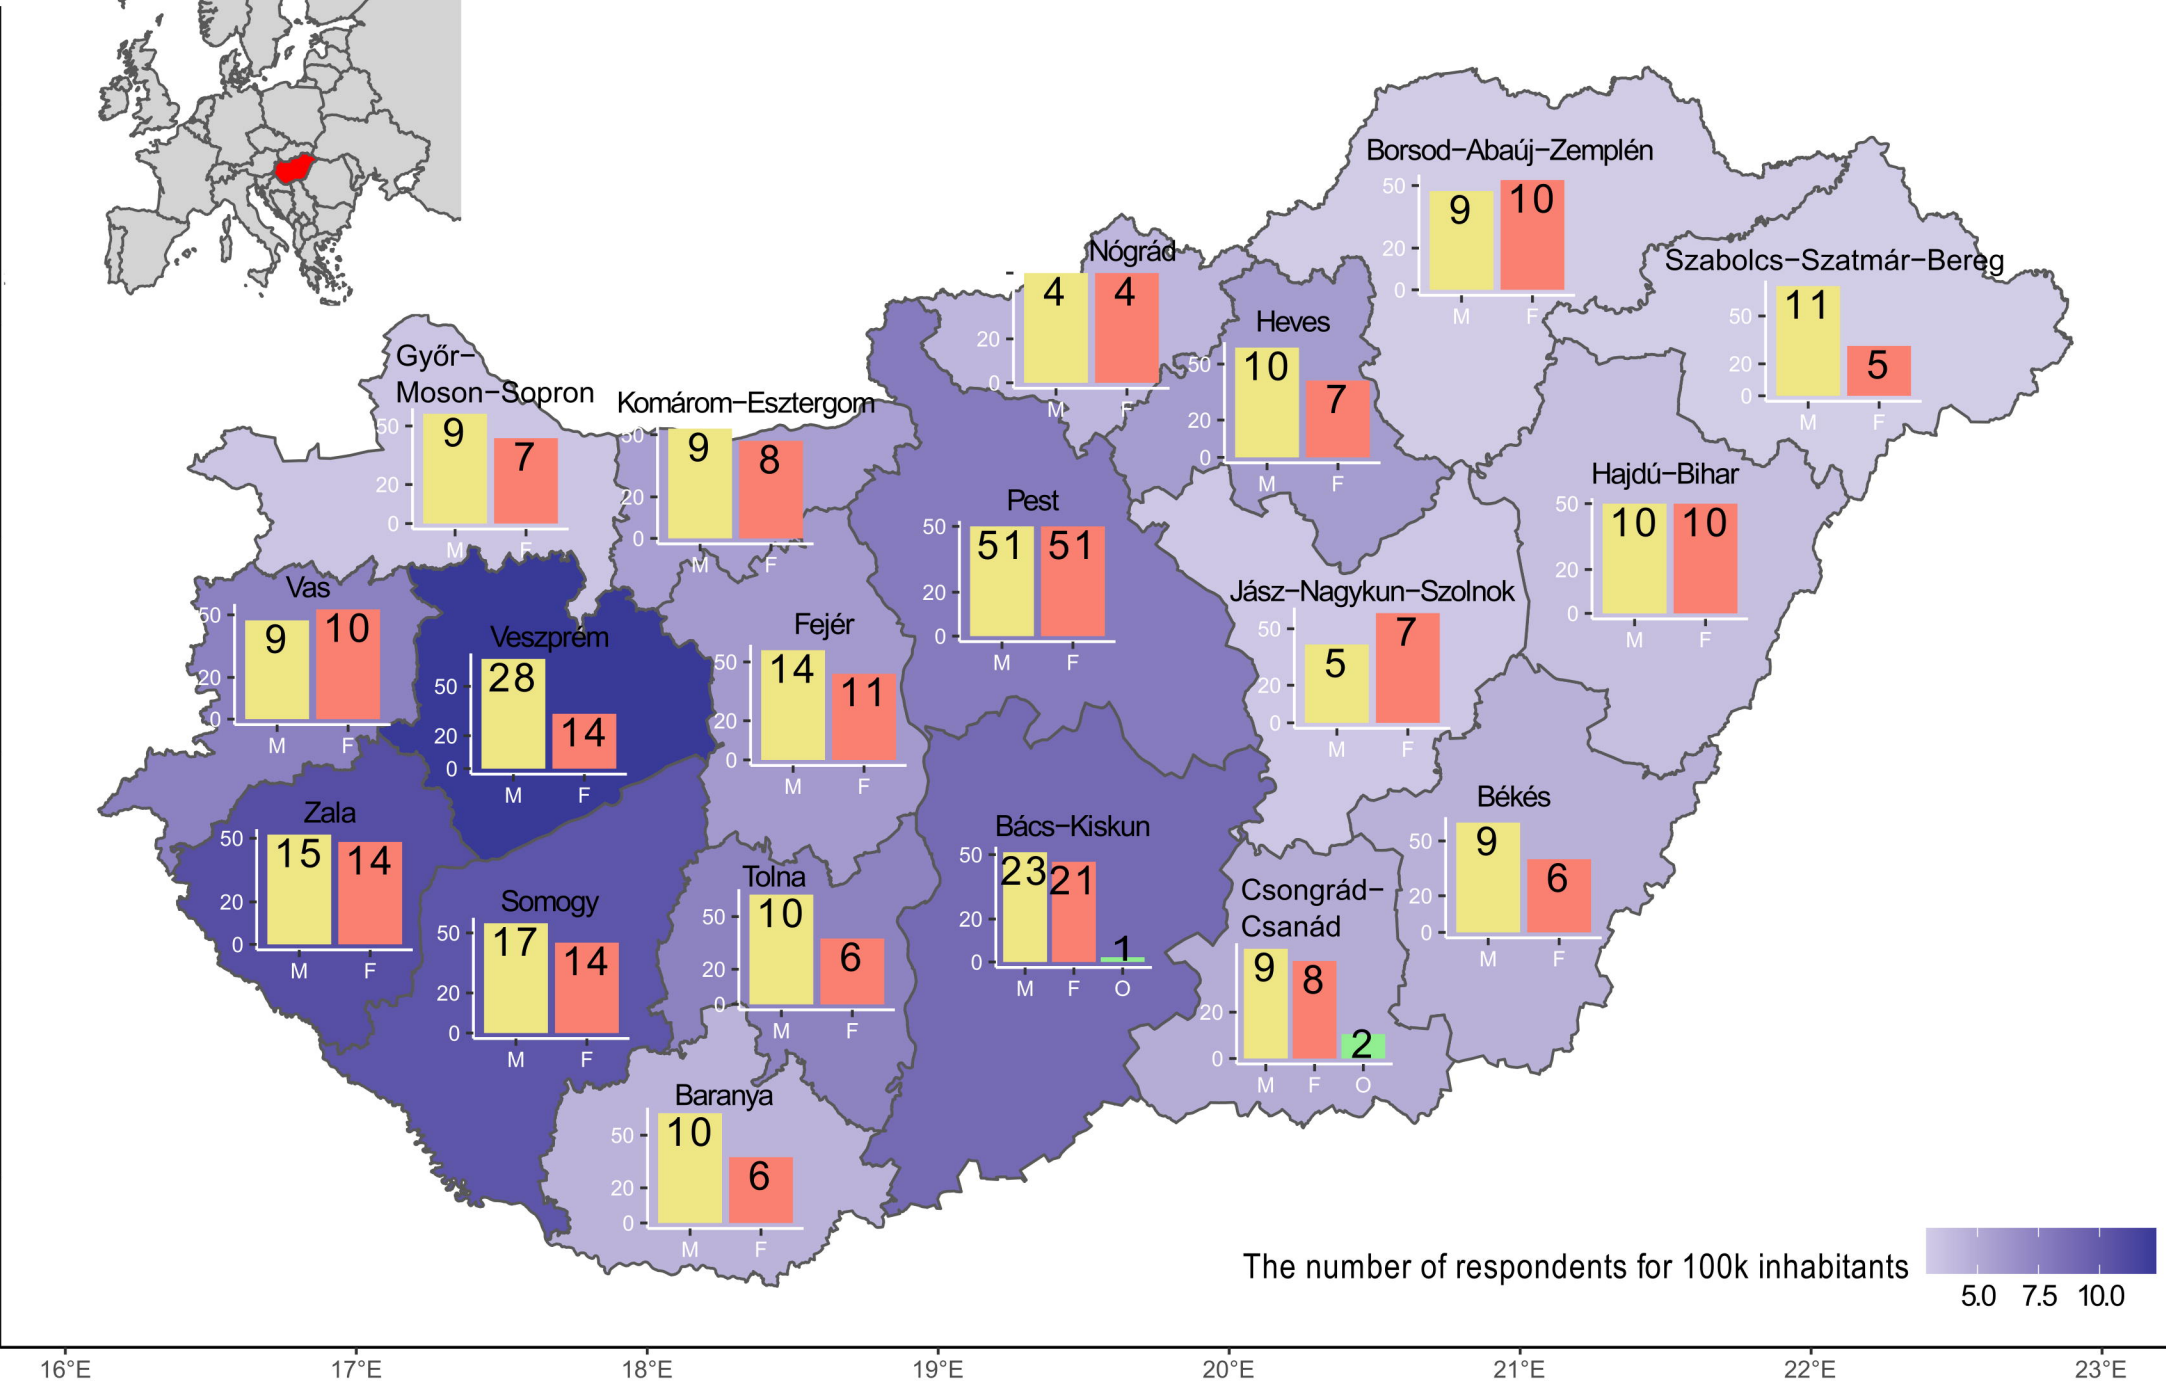

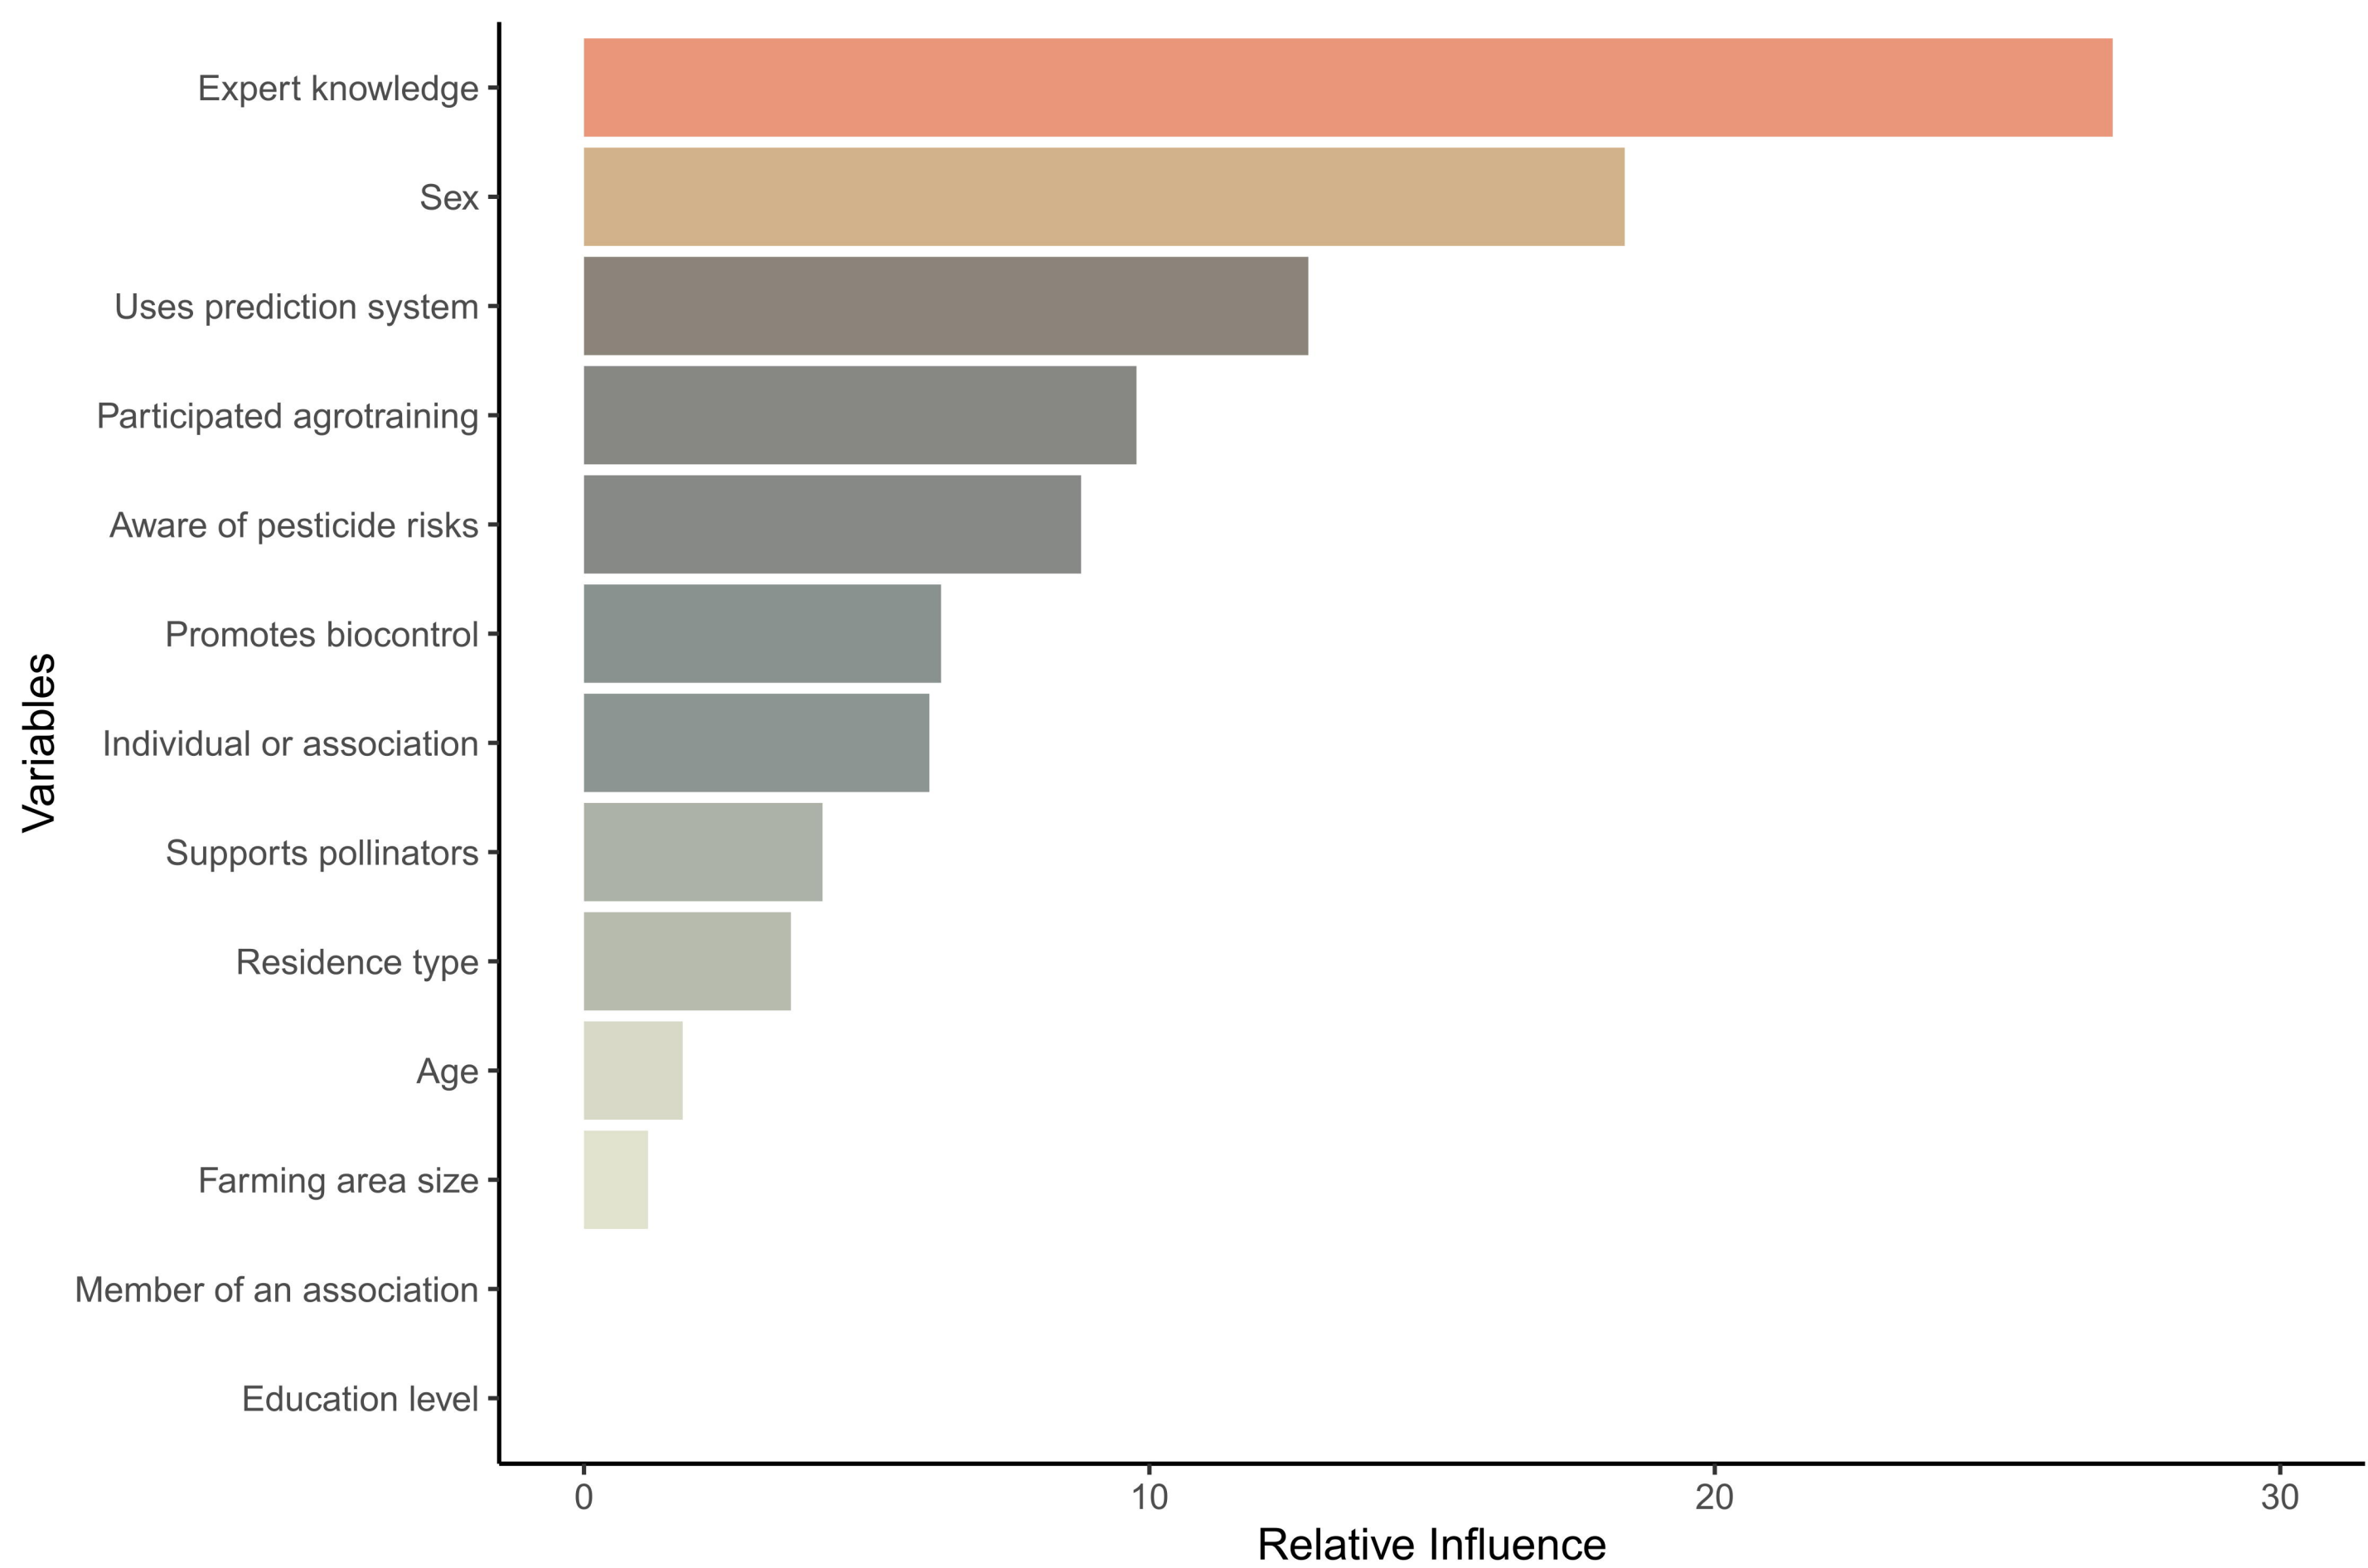



■ not important ■ negligible importance ■ moderately ■ important ■ crucial

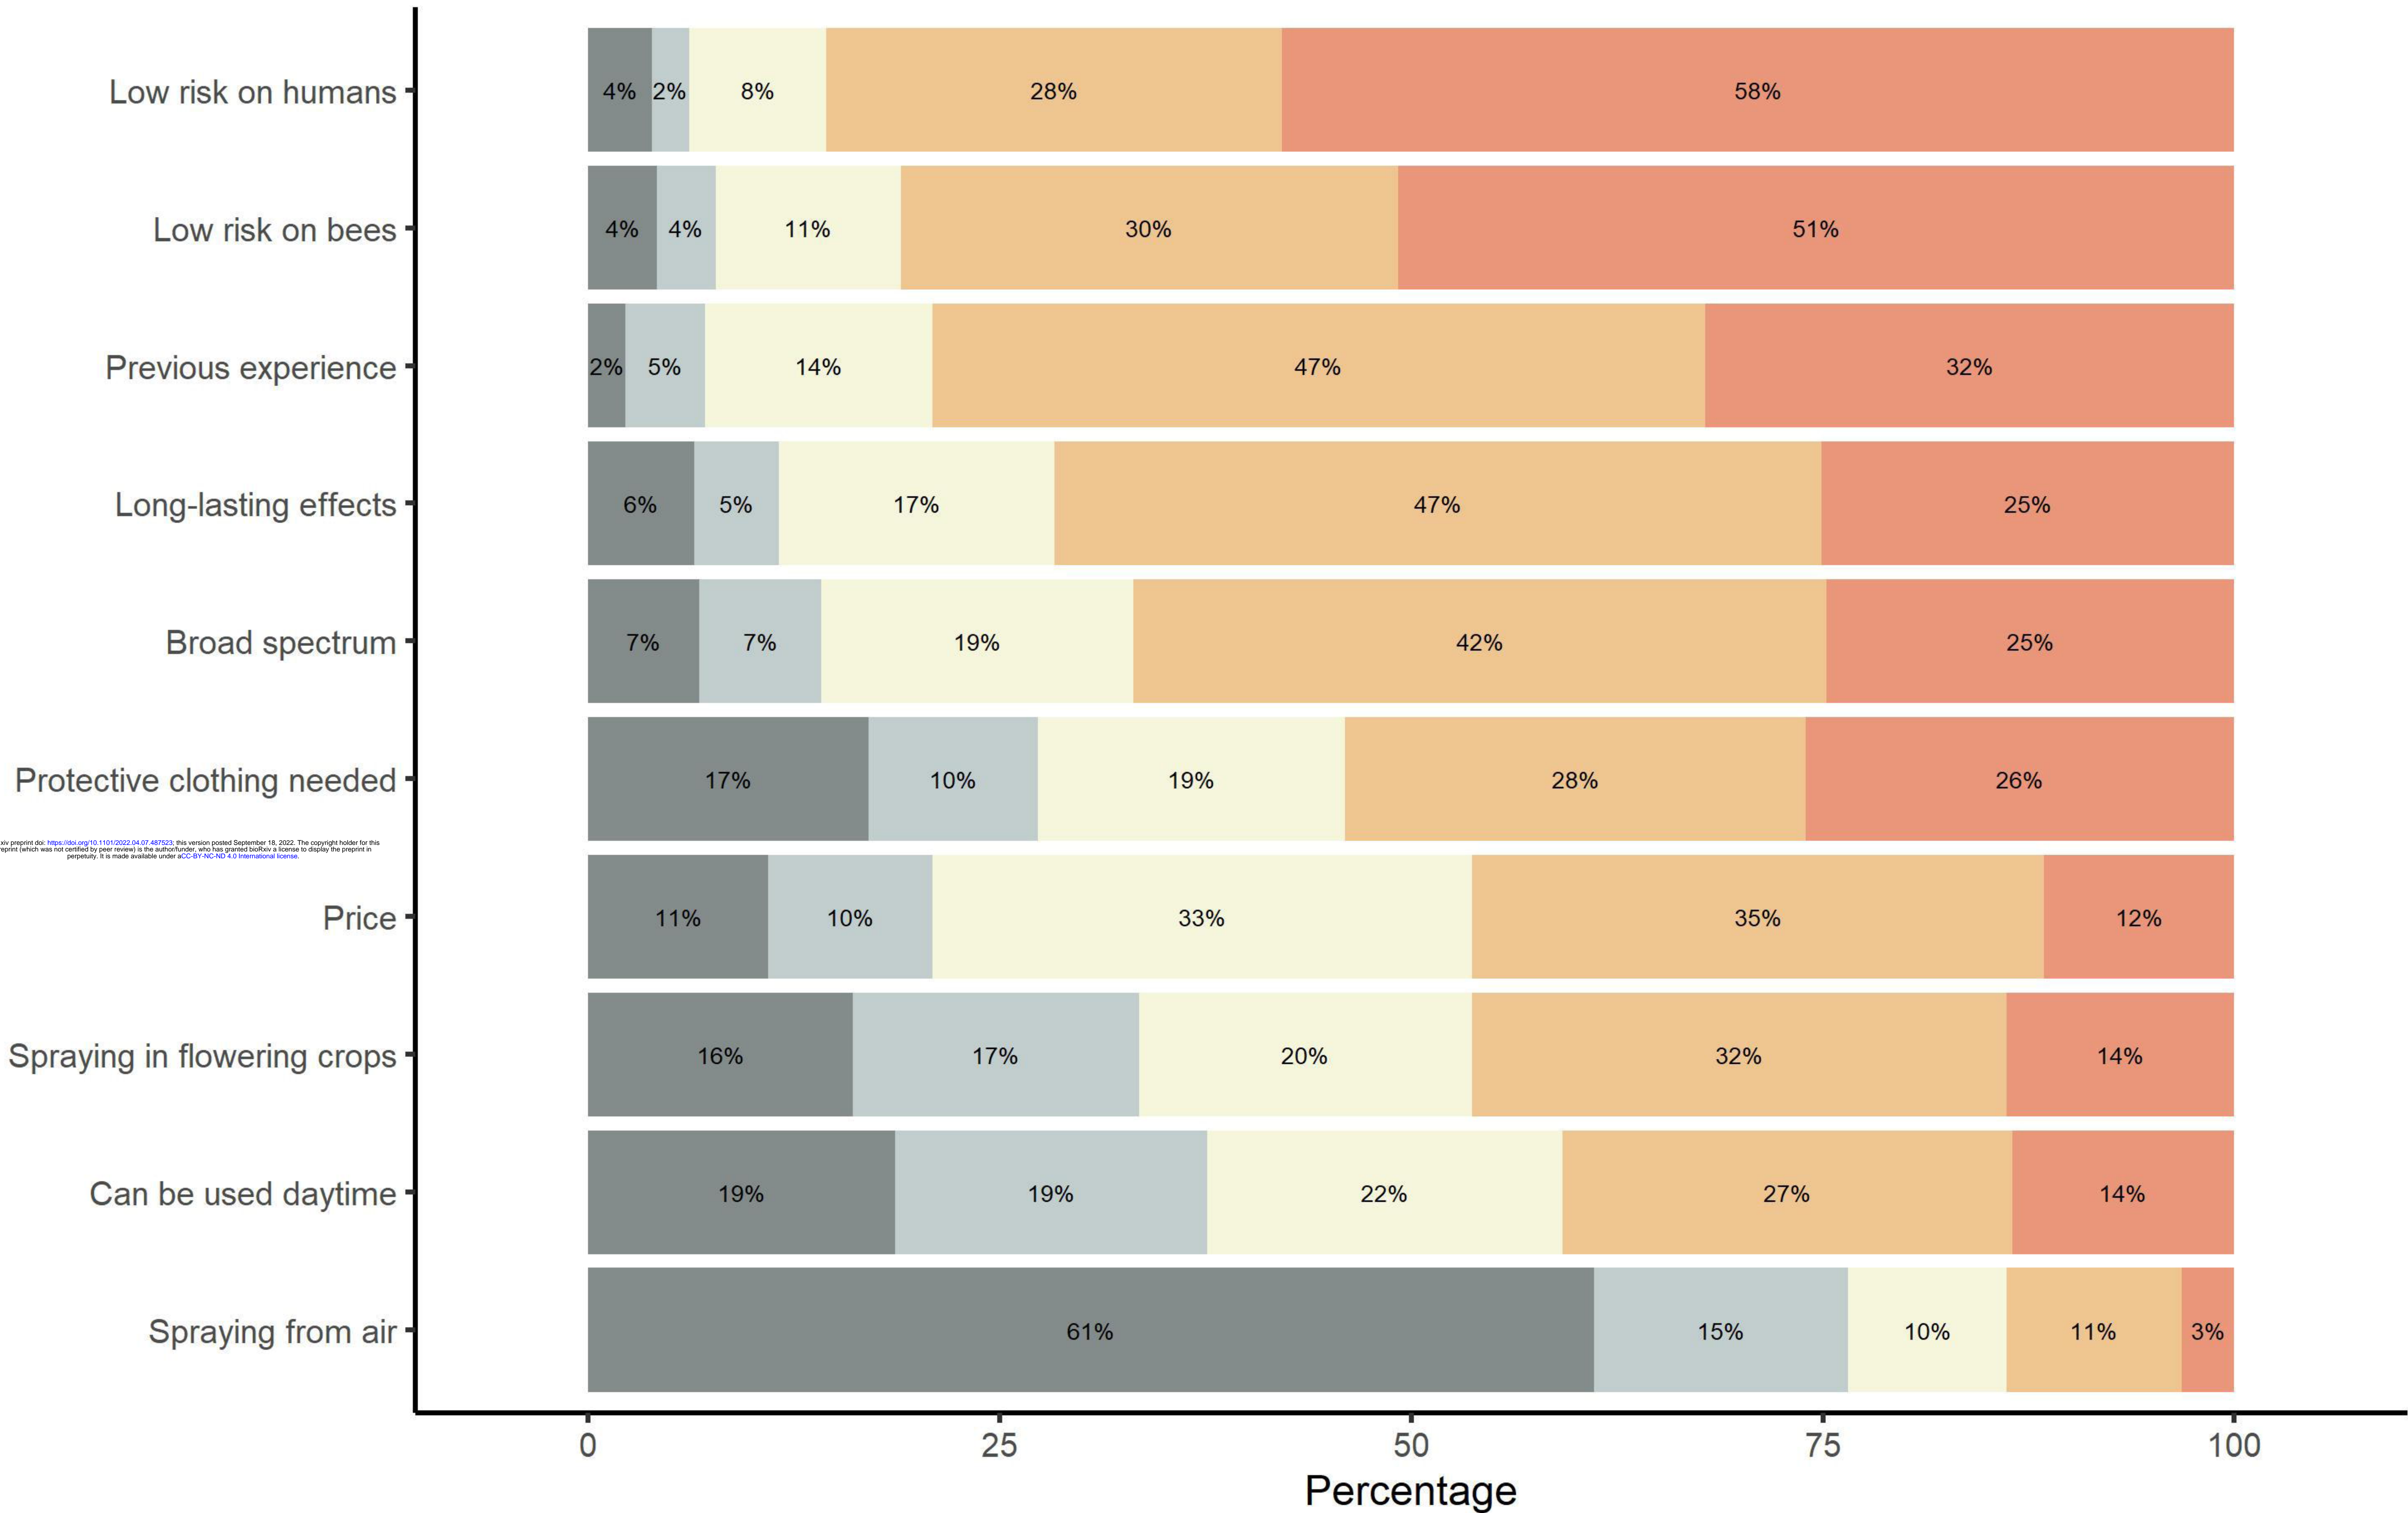

bioRxiv preprint doi: <https://doi.org/10.1101/2022.04.07.487523>; this version posted September 16, 2022. The copyright holder for this preprint (which was not certified by peer review) is the author/funder, who has granted bioRxiv a license to display the preprint in perpetuity. It is made available under aCC-BY-NC-ND 4.0 International license.



not at all negligible crucial

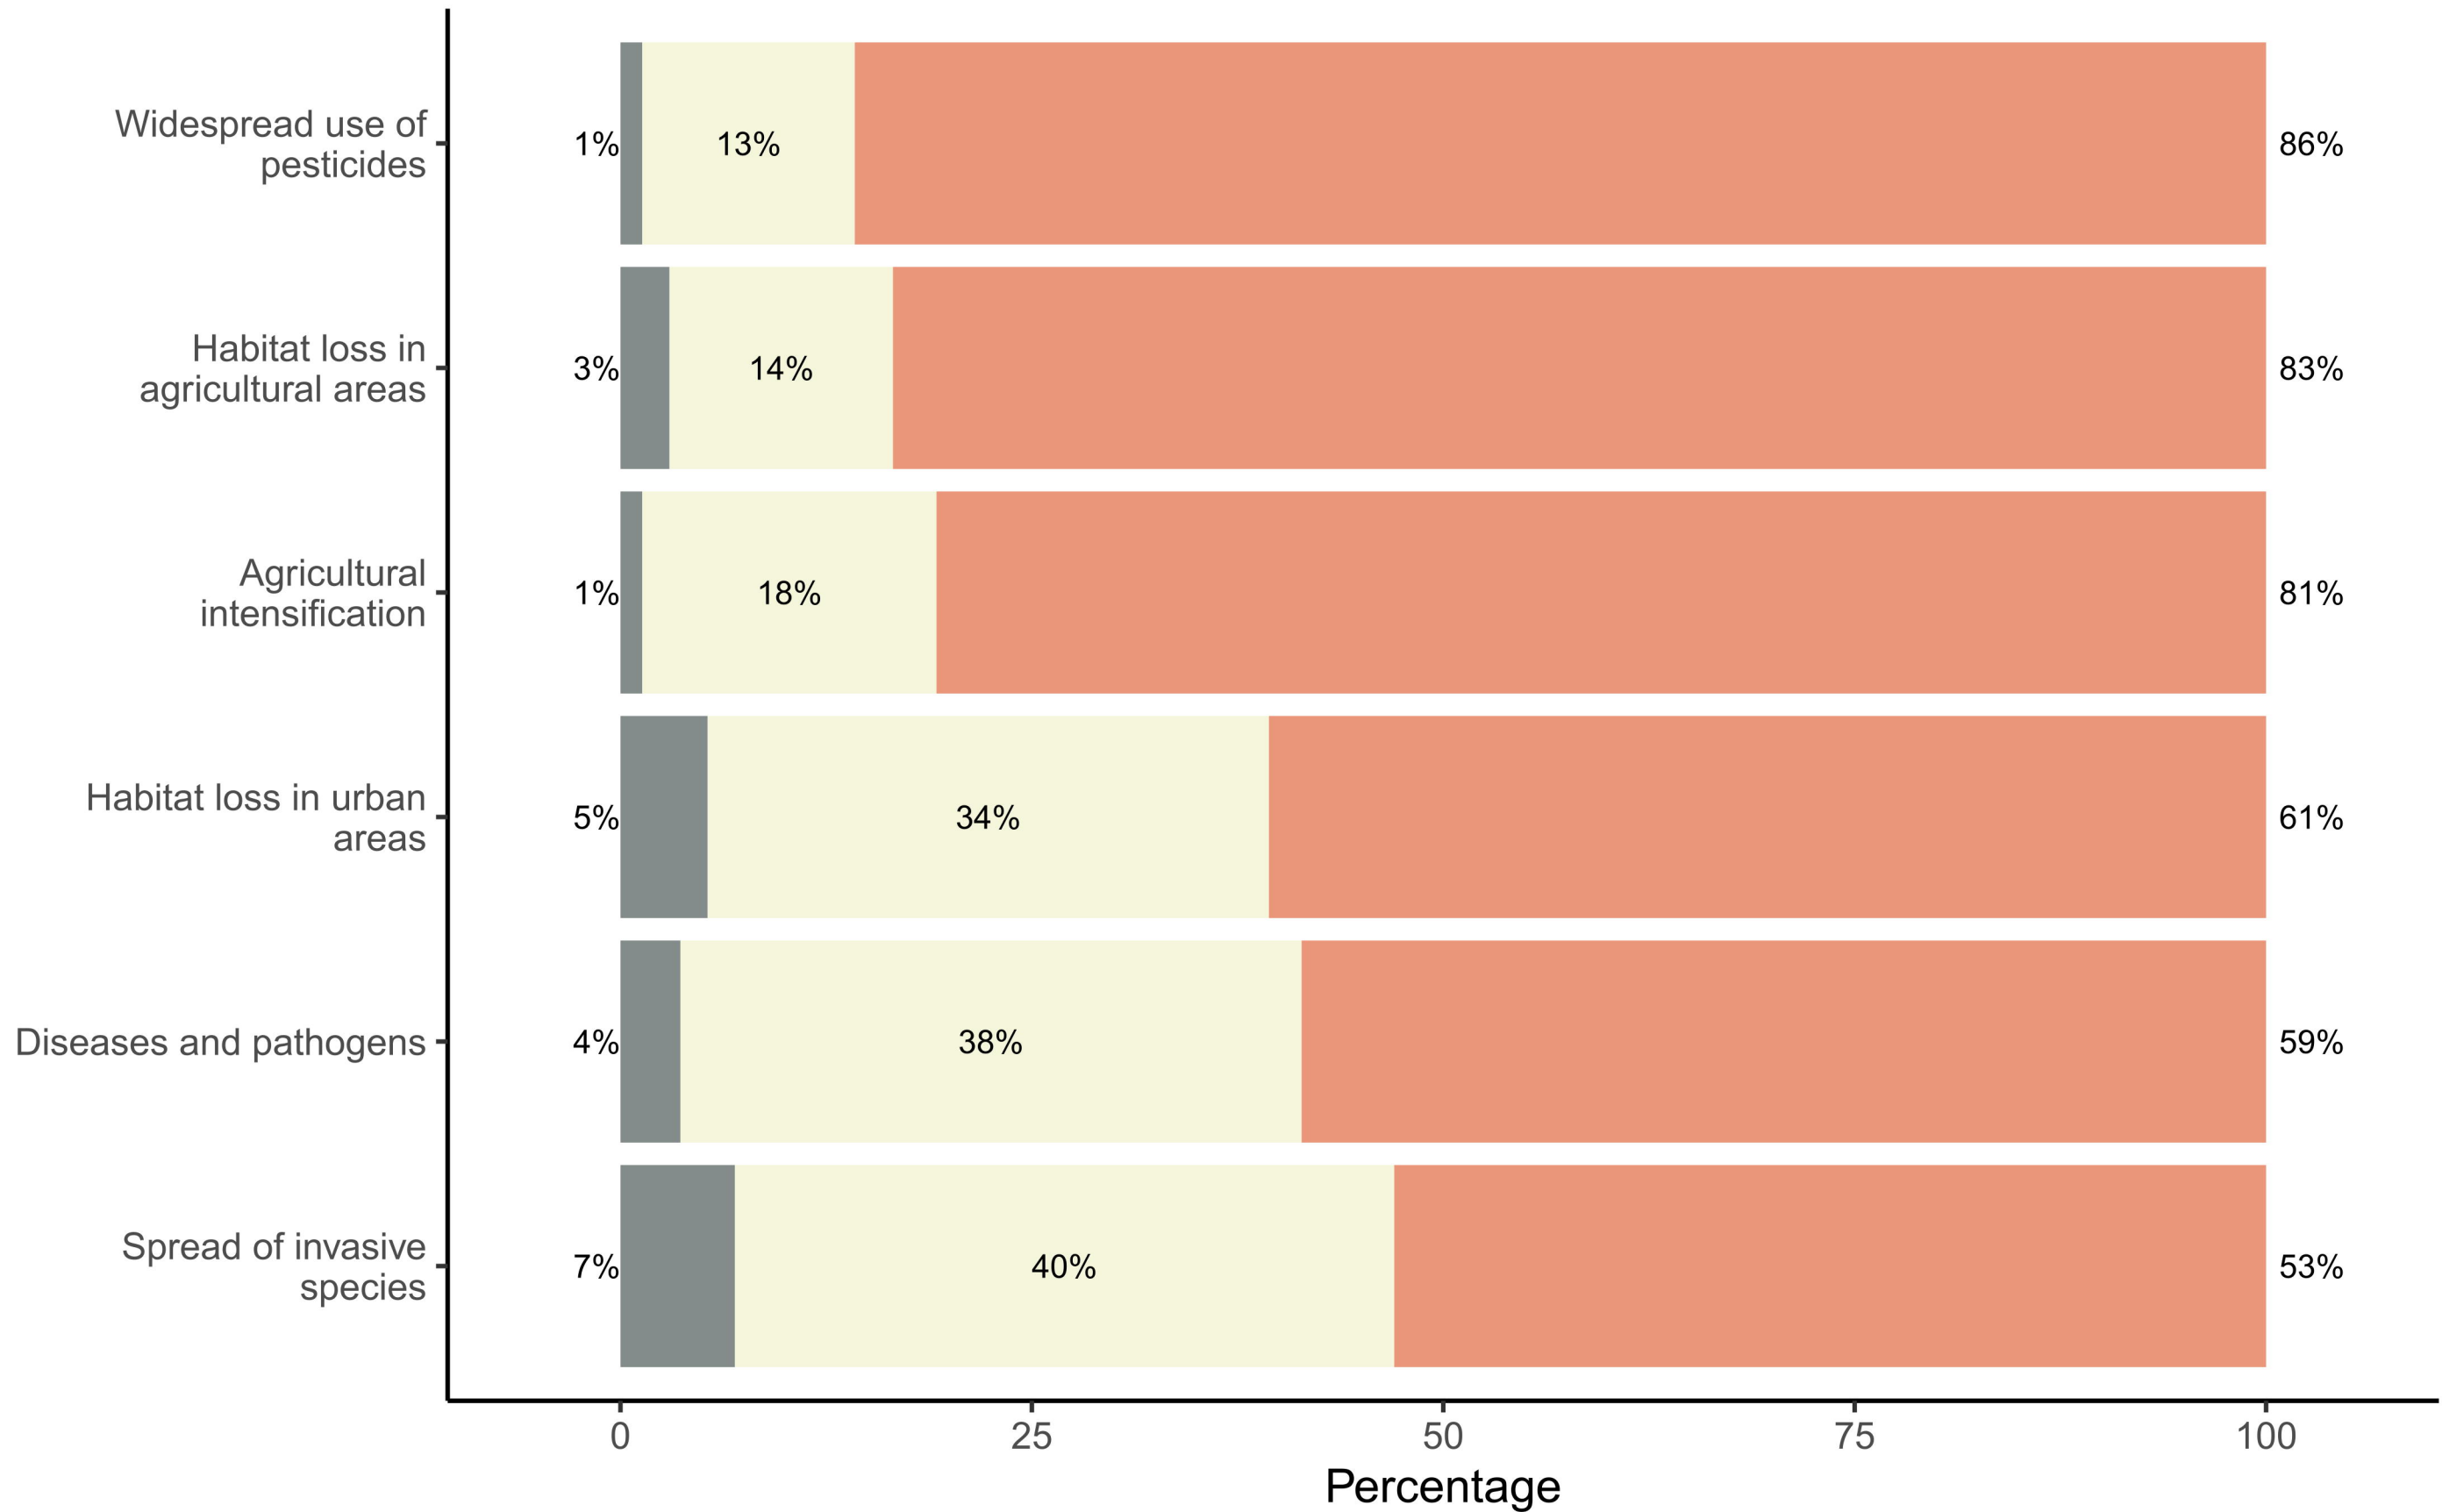

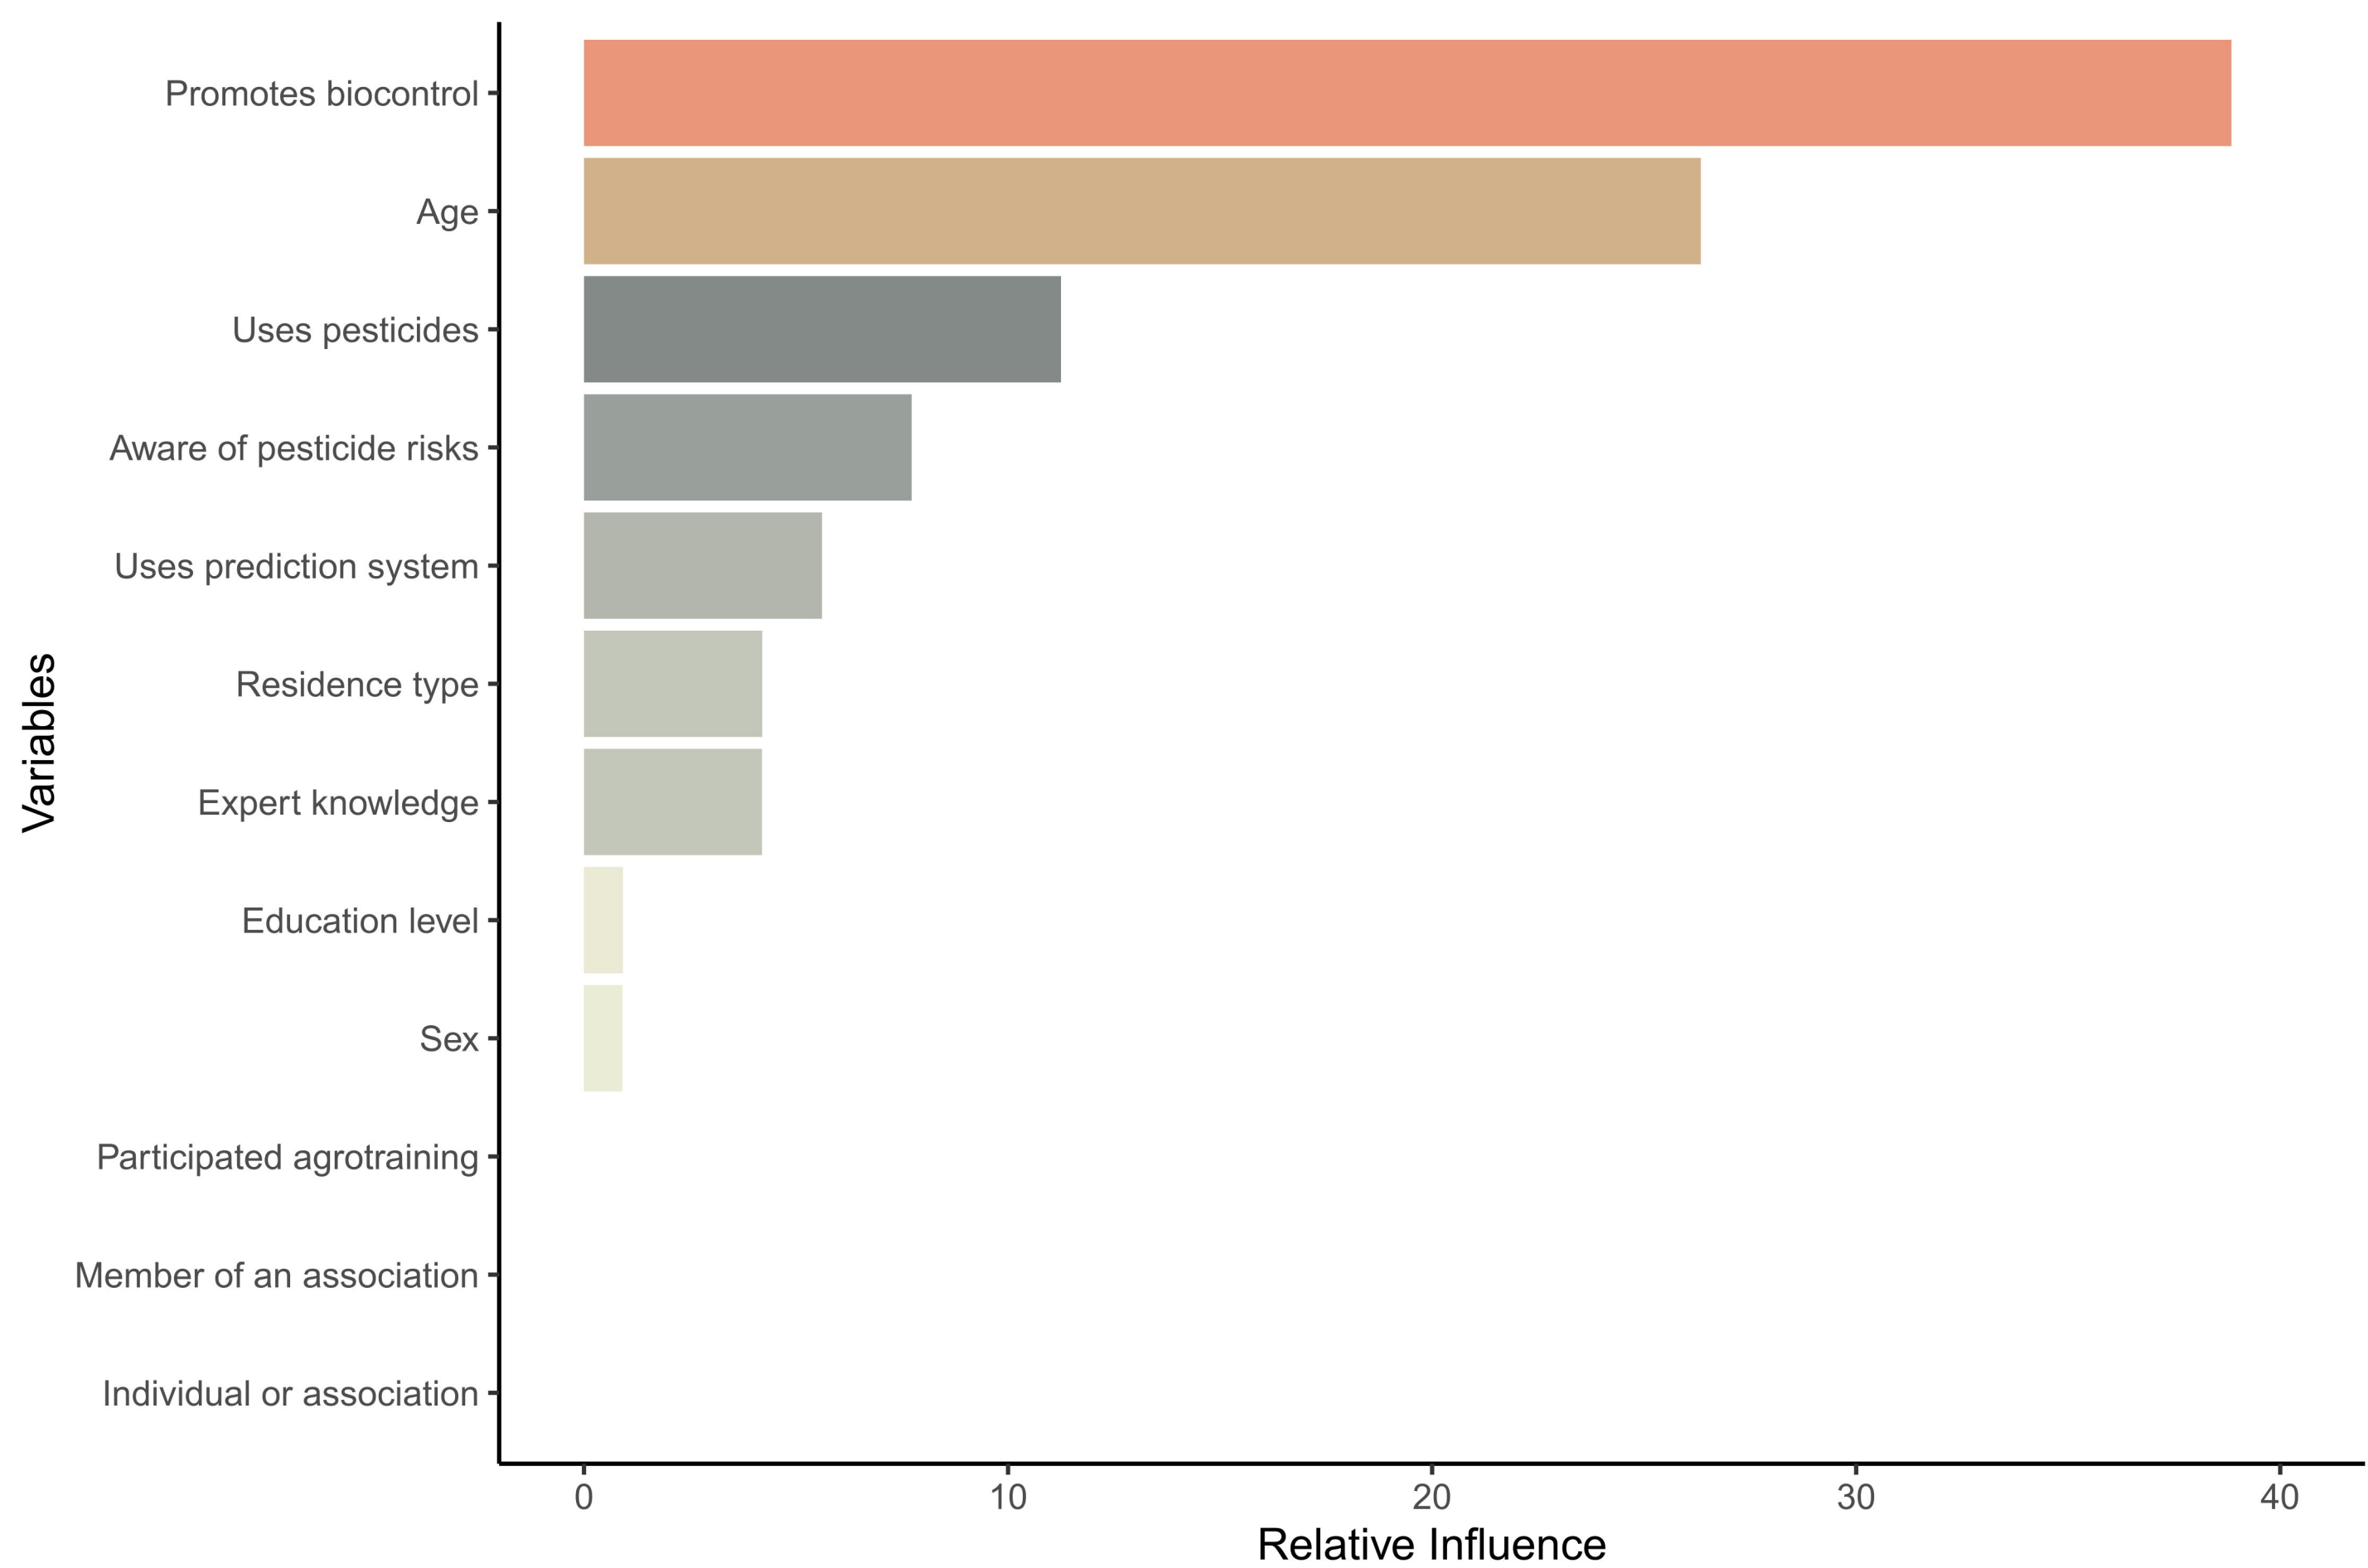

Source: https://www.biorxiv.org/content/10.1101/2022.04.07.487523v3.full.pdf
